1 ***In vivo* study on the healing of bone defect treated with non-thermal atmospheric**  
2 **pressure gas discharge plasma**

3 **Short title: Plasma regenerated bone**

4 Akiyoshi Shimatani<sup>1</sup>, Hiromitsu Toyoda<sup>1\*</sup>, Kumi Orita<sup>1</sup>, Yoshihiro Hirakawa<sup>2</sup>, Kodai Aoki<sup>3</sup>, Jun-Seok  
5 Oh<sup>3,4\*</sup>, Tatsuru Shirafuji<sup>3,4</sup>, and Hiroaki Nakamura<sup>1</sup>

6 **1** Department of Orthopedic Surgery, Graduate School of Medicine, Osaka City University, Osaka 545-  
7 8585, Japan

8 **2** Department of Orthopedic Surgery, Ishikiriseiki Hospital, Osaka 579-8026, Japan

9 **3** Department of Physical Electronics and Informatics, Graduate School of Engineering, Osaka City  
10 University, Osaka 558-8585, Japan

11 **4** BioMedical Engineering Center, Graduate School of Engineering, Osaka City University, Osaka 558-  
12 8585, Japan

13 <sup>\*</sup>[h-toyoda@msic.med.osaka-cu.ac.jp](mailto:h-toyoda@msic.med.osaka-cu.ac.jp) and [jsoh@osaka-cu.ac.jp](mailto:jsoh@osaka-cu.ac.jp)

14

15 **Abstract**

16 Medical treatment using non-thermal atmospheric pressure gas discharge plasma is rapidly gaining  
17 recognition. Gas discharge plasma is thought to generate highly reactive species in an ambient  
18 atmosphere, which could be exposed to biological targets (e.g., cells and tissues). If plasma-generated  
19 reactive species could stimulate bone regeneration, gas discharge plasma could provide a new treatment  
20 opportunity in regenerative medicine. We investigated the impact of plasma on bone regeneration using  
21 a large bone defect in model rabbits and simple atmospheric pressure plasma (helium microplasma jet).  
22 We tracked the recovery progress of the large bone defects by X-ray imaging over eight weeks. The X-  
23 ray results showed a clear difference in the filling of the large bone defect among groups with different  
24 plasma treatment times, whereas filling was not substantial in the untreated control group. According  
25 to the results of micro-computed tomography analysis at eight weeks, the most successful bone  
26 regeneration was achieved using a plasma treatment time of 10 min, wherein the new bone volume was  
27 1.51 times larger than that in the control group. Overall, these results suggest that non-thermal  
28 atmospheric pressure gas discharge plasma is promising for fracture treatment.

29

## 30 **Introduction**

31 Bone fracture or loss is a common and serious medical problem that can result from various causes,  
32 including trauma, surgery, and degenerative diseases, and can significantly compromise a patient's  
33 quality of life. Reportedly, the incidence of fracture in those over 50 years of age is 116.5 per 10,000  
34 people, and the risk of admission for fracture is 47.84 per 10,000 people [1,2]. In most cases, successful  
35 union is achieved by restoration of the alignment and stable fixation of the fracture. However, roughly  
36 5% of bone fractures fail to heal, resulting in nonunion [3]. Patients with nonunion or segmental bone  
37 defects suffer long-term pain, physical disability, reduced quality of life, and significant treatment costs.  
38 These conditions are generally treated by operative means, including some form of bone fixation to  
39 provide adequate stability, decortication of the bone ends, and application of bone graft material to  
40 enhance the healing capacity [4]. Depending on the location and type of revision surgery, the success  
41 rate for nonunion ranges from 68% to 96% [5]. Treatment of delayed unions, nonunions, and bone loss  
42 poses a great challenge for orthopedic surgeons.

43 To date, numerous therapeutic approaches have been developed to enhance fracture healing capacity.  
44 Osteogenic bone formation mainly depends on different cell sources or specific cytokines, such as  
45 growth factors, and hormones. Therapeutic approaches for enhancing fracture healing can be classified  
46 as either biophysical or biological [6]. In the biophysical approach, electromagnetic fields and low-  
47 intensity pulsed ultrasonography are employed [7-11], whereas the biological approach comprises both  
48 local and systemic treatments strategies. Local biological strategies include the use of autologous bone  
49 marrow [12], peptide signaling molecules (fibroblast growth factor-2 and platelet-derived growth  
50 factors) [13,14], and morphogenetic factors (bone morphogenetic proteins and Wnt proteins) [14,15].  
51 The systemic biological approach includes the use of parathyroid hormone [16], humanized monoclonal  
52 anti-sclerostin [17], or anti-Dickkopf-related protein 1 antibodies [18].

53 In recent years, the biomedical application of non-thermal atmospheric pressure plasma (NTAPP),

54 hereafter referred to a plasma, has been gaining recognition [19]. It can be used at atmospheric pressure  
55 without considerably heating the background gas above ambient temperature. Plasma is well-known as  
56 the fourth state of material, composed of partially ionized gas with electrons, ions, excited neutrals, and  
57 high energy photons. Those species do not exist in our daily environment, but interestingly are able to  
58 generate. Many studies have reported the biomedical applications of plasma, such as in wound healing,  
59 disinfection, and cancer treatment, in *in vitro* cell cultures [20-22]. As an indirect treatment, recent  
60 studies have established the potential advantages of plasma treatment in biomaterials used for bone and  
61 cartilage regeneration [23-25]. Moreover, it was reported that plasma can provoke differentiation and  
62 proliferation of stem cells that cause reactive oxygen species (ROS) generation [26]. Another study also  
63 suggested that plasma can induce osteogenic differentiation and enhance bone formation [27].

64 The treatment of bone fracture and loss remains a challenging task, and advanced treatments or  
65 techniques for enhancing fracture healing capacity and repairing large bone defects are needed. In the  
66 present study, we focused on NTAPP gas discharge in addition to these approaches. Herein, we explored  
67 the effects of plasma on bone regeneration by using a single plasma treatment on a critical bone defect  
68 model in New Zealand White Rabbits.

69

## 70 **Materials and methods**

### 71 *Helium microplasma jet treatment*

72 The microplasma jet, hereafter termed plasma jet, used in this work was built in the laboratory and has  
73 been reported in previous studies (Fig 1A) [28-30]. Briefly, the plasma jet assembly is 150 mm long,  
74 with a 4 mm inner diameter and a 6 mm outer diameter glass tube that tapers to 650  $\mu\text{m}$  at the nozzle.  
75 Power was supplied to a single 15 mm long external ring copper electrode wound onto the glass tube at  
76 a distance of 40 mm from the nozzle. The plasma jet assembly comprised a single electrode  
77 configuration. Thus, discharge currents passed through the biological target underneath the plasma

78 plume. The flow rate of helium (He) through the glass tube was fixed at 1.5 standard liters per minute. A  
79 sinusoidal driving high voltage of 10 kV<sub>p-p</sub> (peak-to-peak) at 33 kHz was applied to the external  
80 electrode with a custom-made power supply (ORC Manufacturing Ltd., Japan). The voltage and jet  
81 current waveforms were measured by high voltage probe (PPE 20 kV, LeCroy, Chestnut Ridge, NY,  
82 USA) and a conventional current monitor (Pearson 2877, Pearson Electronics, Palo Alto, CA, USA),  
83 respectively. The voltage and current waveforms were recorded with a digital oscilloscope (WaveJet  
84 300A, LeCroy, Chestnut Ridge, NY, USA), as shown in Figs 1B and 1C. An average input power of  
85 about 0.47 W was used to generate the outflow plasma jet, which was estimated by voltage and current  
86 measurements [28].

87 The optical emission spectrum of the plasma jet as shown in Fig 1D was measured by a fiber optic  
88 spectrometer (OceanOptics, Flame-TX-R1-ES, Largo, USA) associated with a collimating lens. For  
89 plasma parameters, electron temperature ( $T_e$ ) and gas temperature ( $T_g$ ) were estimated by a spectrum  
90 simulator of the N<sub>2</sub> second positive system, which was kindly provided by professor Hiroshi Akatsuka at  
91 the Tokyo Institute of Technology [29]. Using optical emission spectrum,  $T_g$  of the plasma jet, 43.7 °C ±  
92 5.3, was estimated by investigating the rotational temperature ( $T_r$ ) of the N<sub>2</sub> second positive system  
93 ( $C^3\Pi_u$  ( $v' = 0,1$ ) and  $B^3\Pi_g$  ( $v'' = 2,3$ ) [30, 31]. A 5-mm thick polytetrafluoroethylene housing was used to  
94 shield the high voltage electrode for safety. Under the parameters described above, the length of the free  
95 stream plasma jet, as seen with the unaided eye and measured with a ruler, was 12 mm.

### 96 ***Subjects and surgery***

97 Ten female New Zealand White rabbits, 13~16-weeks of age and weighing 3~3.5 kg, were obtained from  
98 SLC Japan Inc (Shizuoka, Japan). Rabbits were housed in a temperature-controlled environment (22 °C  
99 ± 2, humidity of 56% ± 5) with a cycle of 12 h of light and 12 h of dark throughout the experiment. All  
100 of the animals were fed ad libitum with a conventional balanced diet. Rabbits were anesthetized with  
101 ketamine hydrochloride, and a defect measuring 10 mm was made on both ulnar shafts using a bone saw  
102 (Fig 1E). The periosteum was resected with the bony segment 3–5 mm from the proximal and distal ends

103 of the cut bony stumps. The periosteum of the adjacent radial surface was also removed, followed by  
104 irrigation to ensure maximum elimination of any periosteal tissue remnants. Rabbits were categorized  
105 into groups based on their plasma treatment time: 0 min (control group), 5 min, 10 min, and 15 min; each  
106 group was composed of five rabbits. Plasma was irradiated to the defect at a distance of 10 mm from the  
107 end of plasma jet. The plasma treatment was performed once at the time of surgery as shown in figure  
108 1F. Animals were weighed daily up to 3 days post-surgery and weekly thereafter and were monitored  
109 daily for potential signs of dehydration, pain, infection, and deviant behavior. After eight weeks, the  
110 rabbits were sacrificed by an overdose intravenous injection of pentobarbital sodium with little  
111 suffering, and the forearm bones and tibia bones were removed for analysis. The surgery was performed  
112 by two authors (A.S and K.O). The animal protocol was approved by the Animal Ethics Committee of  
113 Osaka City University (permit number 15010 with date of approval 1 April 2018). All procedures were  
114 conducted in compliance with the Animal Research: Reporting of In Vivo Experiments guidelines.

#### 115 ***X-ray and micro-computed tomography analysis***

116 X-rays of each forearm bone were obtained every two weeks until eight weeks after surgery. X-ray  
117 images obtained eight weeks after the surgery were used to measure and compare the occupancy of the  
118 new bone with respect to the defect area. The defect area was defined as the area surrounded by the ulnar  
119 margin of the radius, straight lines extending the ulnar stump, and a straight line connecting the ulna side  
120 edges of the distal and proximal ulnar stumps. Measurement of the defect area and areas of new bone  
121 mass based on X-ray images was performed using ImageJ. To primarily evaluate osteogenesis of the  
122 radial cortex, the degree of radial cortex thickening was evaluated by a unique method. We divided the  
123 X-ray image into three categories according to the amount of cortex as follows: no evidence of cortex  
124 thickening, patchy cortex thickening, and cortical thickening exceeds 50% of the defect site length.  
125 Defect site length was defined as the length from the ulnar margin of radius to the straight line  
126 connecting the ulna side edges of the distal and proximal ulnar stumps. The length of cortical thickening  
127 was defined as the distance from the ulnar margin of the radius to the upper edge of the thickened

128 cortical bone.

129 The extracted rabbit foreleg bones were fixed in a 10% neutral buffered formalin solution at room  
130 temperature. Micro-computed tomography ( $\mu$ -CT) was performed using SMX-90CT Plus, inspeXio  
131 (Shimadzu Corporation Japan). Scan data were reconstructed, and the volume of new bone was  
132 measured using three-dimensional image processing software (ExFact VR, Nihon Visual Science, Inc.  
133 Japan). Image analysis was conducted by two authors (H.T. and Y.H.) in a blinded situation.

### 134 ***Histological analysis***

135 Because X-ray images cannot determine whether a bone defect is filled with new bone, tissue, or both,  
136 we performed a histological analysis for more detail of the recovery bone defect site. After the  $\mu$ -CT  
137 analysis, each sample was decalcified with Morse solution (Wako Pure Chemical Industries, Ltd. Japan)  
138 and dehydrated using an alcohol series. Residual alcohol was removed by immersion in xylene and the  
139 tissue sample was embedded in paraffin block. Tissue slices (4  $\mu$ m thick) were cut using a microtome  
140 and stained using hematoxylin and eosin (H&E) and Masson's trichrome stains, following standard  
141 protocols [32]. The sections were observed using a model BX53F microscope (Olympus, Japan) and  
142 photographed with an Olympus DP74 camera. Images were analyzed using CellSens software (Olympus,  
143 Japan). Histological analysis was conducted by two authors (H.T. and Y.H.) in a blinded situation.

### 144 ***XPS, surface wettability, thermal imaging***

145 To identify surface chemistry and wettability changes, X-ray photoelectron spectroscopy (XPS) and the  
146 water contact angle (WCA) measurement were obtained. XPS analysis was performed on-site, with small  
147 pieces of tibia (around 7 mm  $\times$  7 mm). First, an untreated tibia sample was measured by XPS (ESCA-  
148 3400, Shimadzu, Japan). Then, the same tibia sample was removed and remeasured by XPS after being  
149 treated by the plasma jet for 10 minutes. Similarly, XPS analysis was performed for the artificial bone [ $\beta$ -  
150 -tricalcium phosphate ( $\beta$ -TCP) SUPERPORE, HOYA technological CO., Japan]. In this experiment, 10  
151 min of irradiation was selected to compare the group with the largest amount of new bone and the

152 control group. Separately, WCA measurements were obtained via a contact angle analyzer (DMe-211,  
153 Kyowa Interface Sci. Co., Japan). A total of 1  $\mu$ L of deionized water was dropped onto a section of the  
154 tibia, either untreated or plasma-treated. A plasma treatment time of 10 min was used for both XPS and  
155 WCA measurements. The thermal effect of the plasma treatment was investigated by a thermal imaging  
156 camera (T560, FLIR T560) and analyzed by the FLIR Tool+ (FLIR®, USA). XPS, surface wettability,  
157 and thermal imaging analysis was conducted by three authors (K.A., J.-S.O., and T.S).

### 158 *Statistical analysis*

159 Statistical analysis was performed using the Excel Statistics software for Windows (version 2019; SSRI  
160 Co. Ltd., Tokyo, Japan). Data are expressed as the means and standard deviations. Analysis of data was  
161 performed via a one-way analysis of variance, followed by a multiple comparison using the Tukey test. P  
162 values of  $<0.05$  were considered statistically significant.

163

## 164 **Results**

### 165 *X-ray imaging analysis*

166 As seen in Fig 2A, in all cases, the defect site was filled in from the radius as a function of time. All  
167 defect sites that underwent plasma treatment tended to fill faster than the untreated controls. After eight  
168 weeks, average occupancy of the defect site in the 10-min plasma-treatment group was more than 83%;  
169 70% and 67% of the 15-min and 5-min plasma-treatment group were filled, respectively, and only 59%  
170 of the defect in the control group showed occupancy (Fig 2B). In addition, the highest occupancy score  
171 among each of the groups in order was as follows: 93% for the 10-min treatment group, 84% for the 5-  
172 min treatment group, 84% for the 15-min treatment group, and 67% for the control group. X-ray images  
173 of the control group at eight weeks after surgery revealed that the defect was only partially filled, and  
174 that filling was mainly composed of patchy cortex (Fig 2C). A close inspection of Fig 2C reveals no  
175 cortex thickening in 60% of the control cases, 40% in the 5-min treated cases, and 20% in the 10- and  
176 15-min treated cases at week 2. Patchy cortex thickening and/or cortical thickening exceeding 50% of



177 the defect site length clearly appeared in all cases at week 4. Interestingly, the radiological score was  
178 highest in the 10-min plasma-treated group, among whom 80% demonstrated cortical thickening  
179 exceeding 50% after week 4 (Fig 2C).

### 180 ***Micro-computed tomography***

181 After the rabbits were sacrificed at eight weeks, micro-computed tomography ( $\mu$ -CT) of the defect was  
182 performed to estimate the volume of regenerated new bone aka fraction of bone occupancy, in the  
183 critical bone defect site. New bone mass was significantly higher in the group that underwent plasma  
184 treatment for 10 min compared with that of the control group ( $P = 0.0036$ ) (Fig 3A). The average new  
185 bone volume of the 10 min plasma-treated group was  $162.2 (\pm 14.8) \text{ mm}^3$ , followed by  $131.7 (\pm 4.8)$   
186  $\text{mm}^3$  in the 15 min plasma-treated group;  $118.6 (\pm 6.4) \text{ mm}^3$  in the 5 min; and  $107.6 (\pm 7.8) \text{ mm}^3$  in the  
187 control group.

### 188 ***Histological analysis***

189 Representative images of sections stained with H&E and Masson trichrome stain are shown in Figs 4 and  
190 5, respectively. Although some new bone was observed in the untreated control group (0 min), there  
191 were no cases in which the gap between the bone defects was continuously filled with new bone due to  
192 inclusions, such as fiber tissue and gaps, as expected. On the other hand, in the plasma irradiation groups,  
193 nucleated cells were uniformly observed in the H&E-stained image, and the Masson trichrome-stained  
194 image confirmed that there was no inclusion, and the bone defect was filled with new bone.

### 195 ***Bone surface properties***

196 The on-site XPS measurement shows a significant increase in O1s peak intensity (at 533 eV), but a  
197 decrease in C1s peak intensity (at 286 eV) after plasma treatment (Fig 6A). In addition, the basic  
198 components of bone (i.e., calcium and phosphorus) appeared after the 10-min plasma treatment, but not  
199 by the untreated bone. Unlike the artificial bone, muscles, ligaments, periosteum, etc. were attached to  
200 the surface of the living bone, and the peaks of calcium and phosphorus, which are pure bone  
201 components, observed in the living bone could be due to etching by plasma treatment. Related XPS

202 peaks, Ca2s at 441 eV, Ca2p at 349 eV, P2s at 193 eV, and P2p at 135 eV, were clearly measured. It is  
203 well-known that the oxidized surface is strongly linked to the wet surface where cell adhesion is  
204 improved. We also confirmed a lower WCA of  $42.0^\circ \pm 8.8$  on the plasma-treated tibial surfaces  
205 compared to the WCA of  $90.5^\circ \pm 7.9$  on untreated tibial surfaces.

206 Regarding the thermal effect (or damage) by plasma treatment, we found that the surface temperature  
207 was increased up to 43 °C after the 10-min treatment. The tibial surface temperature was immediately  
208 increased from room temperature to around 40 °C within 30 s, where it remained during the plasma  
209 treatment. The temperature suddenly decreased to nearly room temperature when the plasma jet was  
210 extinguished. These prompt temperature changes clearly illustrate that the temperature reflects the  
211 (plasma) gas temperature; furthermore, the depth of the temperature effect is shallow.

212

## 213 **Discussion**

214 For the last decade, the potential use of NTAPP, with its lower temperature, has been explored in  
215 medical applications for the direct treatment of living tissues through sterilization, blood coagulation  
216 [33,34], wound healing, and tissue regeneration [35]. Furthermore, as an indirect treatment, recent  
217 studies have established the potential advantages of NTAPP treatment of biomaterials for use in bone  
218 and cartilage regeneration [23-25]. However, no previous studies have evaluated the direct bone  
219 regeneration promoting effect of NTAPP by irradiating a large bone defect site. Our survey is the first  
220 report to examine its impact on bone regeneration and to suggest a range of optimal treatment times by  
221 directly irradiating bone defects with NTAPP.

222 The balance between osteoblast-mediated bone formation and osteoclast-mediated bone resorption  
223 controls the bone remodeling process. In orthopedic surgery, sufficient bone regeneration is especially  
224 needed to heal critical-sized bone defects after skeletal injury [35]. Metaphyseal defects of the long bone  
225 in animal models are commonly used to assess bone repair and regeneration because traumatic fractures

226 often occur in the long bones, including the distal radius, proximal femur and proximal humerus.

227 Critical-sized bone defects are often created using animal models [36], of which rabbit ulnar or radial

228 defects sized in a range between 10 and 20 mm have been widely used [37]. In particular, the rabbit ulnar

229 bone was selected in this study because it is easily accessible, appropriately sized, easily assessed

230 surgically as it is in a subcutaneous location with less soft tissue coverage, and has a splinting effect from

231 the radius, so no implant is required. We created a critical bone defect so that there were no cases in

232 which the defect merged in the control group. As a previous study reported, critical bone defects are

233 usually unable to recover without any supporting material, such as artificial bone [38]. However, there

234 were some cases in which the stumps of the ulna were fused to each other in the three plasma-treated

235 groups, although the degree of fusion differed as we seen in Fig 2. Also, as mentioned above, the

236 splinting effect was clearly seen in X-ray (Fig. 2A),  $\mu$ -CT (Fig. 3), and histological section stained with

237 Masson's trichrome (Fig. 4). Especially, histological section stained with Masson's trichrome showed

238 the bone defects was continuously filled with new bone. These results suggest that plasma treatment

239 stimulated and promoted bone fusion. Based on the  $\mu$ -CT results at eight weeks after the surgery, new

240 bone mass was significantly higher in the groups that underwent plasma treatment for 10 min compared

241 with the control group ( $P = 0.0036$ ) (Fig 3). Although there was no statistically significant difference, the

242 volume of new bone with 5 and 15 min treatments were higher than that in the control group (Fig 3A).

243 This result suggests that an optimal treatment time exists, and, in this study, it was direct irradiation for

244 about 10 min. In histological evaluation, the bone ingrowth of the plasma treated group was better than

245 that of the non-treated control. Most of the new bones in the plasma group had continuity with the radial

246 cortex, so it is possible that the cortical bone was significantly affected by the plasma treatment. So far,

247 we understand that highly concentrated excited and ionized reactive oxygen and nitrogen species

248 (RONS) are generated [39]. However, we do not know how the plasma was affected: which reactive

249 species exactly stimulated and promoted new bone generation, and what amount of them was supplied to

250 the bone defect site. Based on our best knowledge of the helium plasma jet and considering the situation

251 of the direct treatment, highly reactive oxygen and nitrogen species (RONS) (e.g., hydroxyl radical  
252 ( $\cdot\text{OH}$ ), nitric oxide (NO), and oxygen-related neutral and positively and negatively charged species)  
253 could stimulate bone regeneration.

254 An *in vitro* study by Tominami *et al* reported enhanced osteoblast differentiation from atmospheric  
255 pressure plasma [40]. The study demonstrates the potential effect of the plasma treatment on bone  
256 regeneration and argued that short-lived but highly ROS (e.g.,  $\cdot\text{OH}$  and  $\cdot\text{O}_2^-$ ) are key components. In  
257 addition to being involved directly in cellular redox reactions, some of the RONS can also be dissolved  
258 in the liquid, culture medium, and cytoplasm to generate longer lived RONS e.g.,  $\text{NO}_2$ ,  $\text{NO}_3$ , ONOO,  
259  $\text{O}_2\text{NOO}$  [41].

260 In our study, since outflow plasma jet was a direct irradiated to the radius surface, it is possible that  
261 various ROS generated by an interaction between plasma and ambient air could affect bone regeneration  
262 as observed strong O1s peak on the plasma treated bone surface. In addition, these ROS can induce  
263 apoptosis at certain higher ROS concentrations [42]. It is considered that the two-sidedness of the plasma  
264 effect is one of the reasons an optimum irradiation time exists. Similar to phototherapy and radiotherapy,  
265 the biological effect of plasma depends on the “treatment dose” delivered into the targets (cell and living  
266 tissue, etc.). However, there have been no clear definition of plasma dose. A recent study proposed that  
267 the definition of plasma dose should be based on the dominant role of RONS in plasma biological effects  
268 [41]. Future research and clinical application can focus on in determining the appropriate plasma  
269 irradiation distance, time, etc. for future research and clinical application. In the early stages of  
270 osseointegration, the initial cell attachment, adhesion, proliferation, and differentiation of osteoblasts at  
271 the implant-bone interface play an important role. Chemical and physical properties of the biomaterial  
272 surface, such as wettability, roughness and topography, affect the behavior of the cells [43]. Surface  
273 wettability is one of the essential parameters affecting the biological response to biomaterials and  
274 implants. In general, it has been reported that high surface wettability promotes greater cell spreading

275 and adhesion [44]. Plasma can modify the surface of materials economically and effectively by removing  
276 hydrocarbon and introducing the hydroxy group. These surface reactions enhance the surface wettability.  
277 Several studies have reported changes in surface biocompatibility in terms of cell attachment and protein  
278 adsorption with plasma treatment [45-47].

279 Although these reports are related to metals and biomaterials, in this study, strong generation of new  
280 bone was observed from the radial cortical bone, so we wondered if there is a similar change on the  
281 surface of the cortical bone. Thus, we compared the contact angles on the cortical bone surface of the  
282 tibia and found that the plasma-treated group was statistically and significantly more hydrophilic than the  
283 untreated control group (Figs 6A and 6B). As seen in Fig 6C, on-site XPS measurement showed a  
284 significant increase of O1 peak intensity after plasma treatment. Moderate oxidation of the bone surface  
285 by plasma irradiation is thought to be associated with increased hydrophilicity. We do not know the  
286 extent to which hydrophilic time-efficiency helps the attachment and growth of cells, as we did not  
287 identify any study that irradiated the bone surface during our study period. However, it may have a  
288 similar effect on the bone surface. We believe that research using cells is needed in our future study.

289 Regarding changes in surface temperature of bone due to plasma irradiation, we confirmed that 10 min  
290 of plasma treatment increased the surface temperature of tibia to around 43 °C at maximum (Fig 6E). It  
291 has been reported that heat in the range of 40–45 °C preserves bioactivity and is biocompatible with  
292 healthy bone cells [48]. Several previous studies have used osteoblast-like MC3T3 cells to analyze the  
293 thermal effects on bone formation *in vitro*. Daily thermal treatment for 10 minutes at 42 °C has been  
294 reported to increase the activity of alkaline phosphatase in MC3T3 cells in a time-dependent manner  
295 compared to non-thermal stress control [49]. It was also reported that 41 °C of heat shock causes  
296 upregulation of osteoblast differentiation from mesenchymal stem cells [50]. Furthermore, it has been  
297 reported that the induction of angiogenesis by heating has the ability to stimulate new bone formation in  
298 and around the bone defect site [51]. From the above studies, it is considered that the increase in bone

299 surface temperature due to plasma irradiation does not adversely affect bone formation. However, in this  
300 study, temperature change on the bone surface due to plasma irradiation was temporary and was unlikely  
301 to have a significant effect on the promotion of bone formation.

302 Now, we considering the plasma treatment on the cell proliferation and blood coagulation. An *in vitro*  
303 study reported that cold atmospheric plasma treatment of osteoblast-like (MG63) cells significantly  
304 upregulated Ki67 and PCNA, indicating active cell proliferation [52]. It was also reported that plasma  
305 can accelerate blood coagulation [53]. Hematomas form between the bone fragments at the bony injury  
306 site, wherein the stages of coagulation, inflammatory response, and healing take place. The early phase is  
307 characterized by high concentrations of mature granulocytes and monocytes/macrophages, as well as  
308 helper and cytotoxic lymphocytes in the hematoma. In addition, high levels of inflammatory and anti-  
309 inflammatory cytokines are found in the hematoma [54]. The cytokines present in the hematoma, as well  
310 as other growth factors, stimulate the differentiation of mesenchymal cells of the bone marrow toward  
311 the chondrogenic and osteogenic lines [55]. Results from the above reports, it is considered that  
312 promotion of cell proliferation and hematoma formation by plasma may promote bone regeneration.

313 As our best knowledge, this present study is the first demonstration that direct plasma treatment of  
314 bone defects increases new bone mass. Based on the results of the morphological and histological repair  
315 of bone defects, plasma exposure may effectively enhance fracture healing capacity and may, in the  
316 future, be used in clinics to shorten the bone union period and inhibit the occurrence of nonunion.

## References

1. Curtis, E. M., van der Velde, R., Moon, R. J., van der Bergh, J. P. W., Geusens, P., de Vries, F., van Staa, T. P., Cooper, C., & Garvery, N. C., Epidemiology of fractures in the United Kingdom 1988–2012: variation with age, sex, geography, ethnicity and socioeconomic status. *Bone* **87**, 19–26. DOI: <https://doi.org/10.1016/j.bone.2016.03.006> (2016).
2. Jennison, T. & Brinsden, M., Fracture admission trends in England over a ten-year period. *Ann. R. Coll. Surg. Engl.* **101**, 208–214. DOI: <https://doi.org/10.1308/rcsann.2019.0002> (2019).
3. Zura, R., Xiong, Z., Einhorn, T., Watson, J. T., Ostrum, R. F., Prayson, M. J., Della Rocca, G. J., Mehta, S., McKinley, T., Wang, Z., & Steen, R. G., Epidemiology of fracture nonunion in 18 human bones. *JAMA Surg.* **151**, e162775. DOI: <https://doi.org/10.1001/jamasurg.2016.2775> (2016).
4. Bell, A., Templeman, D. & Weinlein, J. C. Nonunion of the femur and tibia: an update. *Orthop. Clin. N. Am.*, **47**, 365–375, DOI: <https://doi.org/10.1016/j.ocl.2015.09.010> (2016).
5. Gebauer, D., Mayr, E., Orthner, E., & Ryaby, J. P., Low-intensity pulsed ultrasound: effects on nonunions. *Ultrasound Med. Biol.* **31**, 1391–1402. DOI: <https://doi.org/10.1016/j.ultrasmedbio.2005.06.002> (2005).
6. Einhorn, T. A. & Gerstenfeld, L. C., Fracture healing: mechanisms and interventions. *Nat. Rev. Rheumatol.* **11**, 45–54. DOI: <https://doi.org/10.1038/nrrheum.2014.164> (2015).
7. Goldstein, C., Sprague, S., & Petrisor, B. A., Electrical stimulation for fracture healing: current evidence. *J. Orthop. Trauma*, **24**, S62–S65. DOI: <https://doi.org/10.1097/BOT.0b013e3181cdde1b> (2010).
8. Ebrahim, S., Mollon, B., Bance, S., Busse, J. W., & Bhandari, M., Low-intensity pulsed ultrasonography versus electrical stimulation for fracture healing: a systematic review and network meta-analysis, *Can. J. Surg.* **57**, E105–18. DOI: <https://doi.org/10.1503/cjs.010113> (2014).
9. Assiotis, A., Sachinis, N. P., & Chalidis, B. E., Pulsed electromagnetic fields for the treatment of tibial delayed unions and nonunions: a prospective clinical study and review of the literature, *J. Orthop. Surg. Res.*, **7**, 24. DOI: <https://doi.org/10.1186/1749-799X-7-24> (2012).
10. Aleem, I. S., Aleem, I., Evaniew, N., Busse, J. W., Yaszemski, M., Agarwal, A., Einhorn, T., & Bhandari, M., Efficacy of electrical stimulators for bone healing: a meta-analysis of randomized sham-controlled trials. *Sci. Rep.* **6**, 31724. DOI: <https://doi.org/10.1038/srep31724> (2016).
11. Bashardoust Tajali, S., Houghton, P. MacDermid, J. C., & Grewal, R., Effects of low-intensity pulsed ultrasound therapy on fracture healing: a systematic review and meta-analysis, *Am. J. Phys. Med. Rehabil.* **91**, 349–367. DOI: <https://doi.org/10.1097/PHM.0b013e31822419ba> (2012).
12. Hernigou, Ph., Poignard, A., Beaujean, F., & Rouard, H., Percutaneous autologous bone-marrow grafting for nonunions. Influence of the number and concentration of progenitor cells. *J. Bone Joint Surg. Am.* **87**, 1430–1437. DOI: <https://doi.org/10.2106/JBJS.D.02215> (2005).
13. Kawaguchi, H. *et al.*, A local application of recombinant human fibroblast growth factor 2 for tibial shaft fractures: A randomized, placebo-controlled trial. *J. Bone Miner. Res.* **25**, 2735–2743. DOI: <https://doi.org/10.1002/jbmr.146> (2010).
14. Nauth, A., Giannoudis, P. V., Einhorn, T. A., Hankenson, K. D., Friedlaender, G. E., Li, R., & Schemitsch, E. H., Growth factors: beyond bone morphogenetic proteins. *J. Orthop. Trauma* **24**, 543–546. DOI: <https://doi.org/10.1097/BOT.0b013e3181ec4833> (2010).
15. Minea, S., Leucht, P., Jiang, J., Liu, B., Zeng, A., Fuerer, C., Nusse, R., & Helms, J. A., Wnt proteins promote bone regeneration. *Sci. Transl. Med.* **2**, 29ra30. DOI: <https://doi.org/10.1126/scitranslmed.3000231> (2010).
16. Cipriano, C. A., Issack, P. S., Shindle, L., Werner, C. M. L., Helfet, D. L., & Lane, J. M., Recent advances toward the clinical application of PTH (1-34) in fracture healing. *HSS J.* **5**, 149–153. DOI: <https://doi.org/10.1007/s11420-009-9109-82009> (2009).
17. Suen, P. K. *et al.* Sclerostin monoclonal antibody enhanced bone fracture healing in an open osteotomy model in rats. *J. Orthop. Res.* **32**, 997–1005. DOI: <https://doi.org/10.1002/jor.22636>



- (2014).
18. Glantschnig, H., Hampton, R. A., Lu, P., Zhao, J. Z., Vitelli, S., Huang, L., Haytko, P., Cusick, T., Ireland, C., Jarantow, S. W., Ernst, R., Wei, N., Nantermet, P., Scott, K. R., Fisher, J. E., Talamo, F., Orsatti, L., Reszka, A. A., Sandhu, P., Kimmel, D., Flores, O., Strohl, W., An, Z., & Wang, F., Generation and selection of novel fully human monoclonal antibodies that neutralize Dickkopf-1 (DKK1) inhibitory function in vitro and increase bone mass in vivo. *J. Biol. Chem.* **285**, 40135–40147. DOI: <https://doi.org/10.1074/jbc.M110.166892> (2010).
  19. Graves, D., Hamaguchi, S., & O’Connell, D., In Focus: plasma medicine. *Biointerphases*. **10**, 029301. DOI: [10.1116/1.4922357](https://doi.org/10.1116/1.4922357) (2015)
  20. Gweon, B., Kim, K., Choe, W., & Shin, J. H., Therapeutic uses of atmospheric pressure plasma: cancer and wound. *Biomedical Engineering: Frontier Research and Converging Technologies*, DOI: [https://doi.org/10.1007/978-3-319-21813-7\\_15](https://doi.org/10.1007/978-3-319-21813-7_15) (2015)
  21. Friedman, G., Gutsol, A., Shekhter, A. B., Vasilets, V. N., & Fridman, A., Applied plasma medicine. *Plasma Processes and Polymers*. **5**, 503–533. DOI: <https://doi.org/10.1002/ppap.200700154> (2008).
  22. Szili, E. J., Oh, J.-S., Fukuhara, H., Bhatia, R., Gaur, N., Nguyen, C. K., Hong, S.-H., Ito, S., Ogawa, K., Kawada, C., Shuin, T., Tsuda, M., Furihata, M., Kurabayashi, A., Furuta, H., Ito, M., Inoue, K., Hatta, A., & Short, R. D., Modelling the helium plasma jet delivery of reactive species into a 3D cancer tumour. *Plasma Sources Sci. Technol.* **27**, 014001. DOI: <https://doi.org/10.1088/1361-6595/aa9b3b> (2017).
  23. Tan, F., O’Neill, F., Naciri, M., Dowling, D., & Al-Rubeai, M., Cellular and transcriptomic analysis of human mesenchymal stem cell response to plasma-activated hydroxyapatite coating. *Acta Biomaterialia* **8**, 1627–38. DOI: <https://doi.org/10.1016/j.actbio.2011.12.014> (2012).
  24. Chen, J.-P. & Su, C.-H., Surface modification of electrospun PLLA nanofibers by plasma treatment and cationized gelatin immobilization for cartilage tissue engineering. *Acta Biomaterialia* **7**, 234–43. DOI: <https://doi.org/10.1016/j.actbio.2010.08.015> (2011).
  25. Moriguchi, Y., Lee, D.-S., Chijimatsu, R., Thamina, K., Masuda, K., Itsuki, D., Yoshikawa, H., Hamaguchi, S., & Myoui, A., Impact of non-thermal plasma surface modification on porous calcium hydroxyapatite ceramics for bone regeneration. *PLoS One* **13**, e0194303. DOI: <https://doi.org/10.1371/journal.pone.0194303> (2018).
  26. Park, J., Lee, H., Lee, H. J., Kim, G. C., Kim, D. Y., Han, S., & Song, K., Non-thermal atmospheric pressure plasma efficiently promotes the proliferation of adipose tissue-derived stem cells by activating NO-response pathways. *Sci. Rep.* **6**, 39298. DOI: <https://doi.org/10.1038/srep39298> (2016).
  27. Han, I. & Choi, E. H., The role of non-thermal atmospheric pressure biocompatible plasma in the differentiation of osteoblastic precursor cells, MC3T3-E1. *Oncotarget* **8**, 36399-36409. DOI: <https://doi.org/10.18632/oncotarget.16821> (2017).
  28. Oh, J.-S., Kakuta, M., Furuta, H., Akatsuka, H., & Hatta, A., Effect of plasma jet diameter on the efficiency of reactive oxygen and nitrogen species generation in water. *Jpn. J. Appl. Phys.* **55**, 06HD01 DOI: <http://doi.org/10.7567/JJAP.55.06HD01> (2016).
  29. Koike, S., Sakamoto, T., Kobori, S., Matsuura, H., & Akatsuka, H., Spectroscopic study on vibrational nonequilibrium of a microwave discharge nitrogen plasma, *Jpn. J. Appl. Phys.*, **43**, 5550–5557. DOI: <https://doi.org/10.1143/JJAP.43.5550> (2004).
  30. Oh, J.-S., Szili, E. J., Gaur, N., Hong, S.-H., Furuta, H., Kurita, H., Mizuno, A., Hatta, A., & Short, R. D., How to assess the plasma delivery of RONS into tissue fluid and tissue. *J. Phys. D: Appl. Phys.* **49**, 304005. DOI: <http://doi.org/10.1088/0022-3727/49/30/304005> (2016).
  31. Duriyasart, F., Ohtani, M., Oh, J.-S., Hatta, A., & Kobiro, K., A new approach to surface activation of porous nanomaterials using non-thermal helium atmospheric pressure plasma jet treatment. *Chem. Commun.* **53**, 6704. DOI: <http://doi.org/10.1039/c7cc02927f> (2017).
  32. Kleinschmidt, K., Ploeger, F., Nickel, J., Glockenmeier, J., Kunz, P., Richter, W., Enhanced reconstruction of long bone architecture by a growth factor mutant combining positive features of



- GDF-5 and BMP-2. *Biomaterials* **34**(24): 5926–36. DOI: <https://doi.org/10.1016/j.biomaterials.2013.04.029> (2013).
33. Fridman, G., Peddinghaus, M., Balasubramanian, M., Ayan, H., Fridman, A., Gutsol, A., & Brooks, A., Blood coagulation and living tissue sterilization by floating-electrode dielectric barrier discharge in air. *Plasma Chem Plasma Processing*, **27**, 113–114. DOI: 10.1007/s11090-006-9038-y (2007).
  34. Ikehara, S., Sakakita, H., Ishikawa, K., Akimoto, Y., Yamaguchi, T., Yamagishi, M., Kim, J., Ueda, M., Ikeda, J.-I., Nakanishi, H., Shimizu, N., Hori, M., Ikehara, Y., Plasma blood coagulation without involving the activation of platelets and coagulation factors. *Plasma Process. Polym.* **12**, 1348-1353. DOI: <https://doi.org/10.1002/ppap.201500132> (2015).
  35. Toda, M., Ohno, J., Shinozaki, Y., Ozaki, M., & Fukushima, T., Osteogenic potential for replacing cells in rat cranial defects implanted with a DNA/protamine complex paste. *Bone* **67**, 237–245. DOI: <https://doi.org/10.1016/j.bone.2014.07.018> (2014).
  36. ASTM Standard F2721-09. (2009). Standard Guide for Pre-Clinical in vivo Evaluation in Critical Size Segmental Bone Defects. West Conshohocken, PA: Astm International; Available at: <http://Www.Astm.Org>
  37. Horner, E. A., Kirkham, J., Wood, D., Curran, S., Smith, M., Thomson, B., & Yang, X. B., Long bone defect models for tissue engineering applications: criteria for choice. *Tissue Eng. Part B Rev.* **16**, 263–271. DOI: 10.1089/ten.TEB.2009.0224 (2010).
  38. Takahata, T., Okihara, T., Yoshida, Y., Yoshihara, K., Shiozaki, Y., Yoshida, A., Yamane, K., Watanabe, N., Yoshimura, M., Nakamura, M., Irie, M., van Meerbeek, B., Tanaka, M., Ozaki, T., Matsukawa, A., Bone engineering by phosphorylated-pullulan and  $\beta$ -TCP composite. *Biomed. Mater.* **10**, 065009. DOI: 10.1088/1748-6041/10/6/065009 (2015).
  39. Oh, J.-S., Aranda-Gonzalvo, Y., Bradley, J.W., Time-resolved mass spectroscopic studies of an atmospheric-pressure helium microplasma jet. *J. Phys. D Appl. Phys.*, **44**, 365202. DOI: <https://doi.org/10.1088/0022-3727/44/36/365202> (2011).
  40. Tominami, K., Kanetaka, H., Sasaki, S., Mokudai, T., Kaneko, T., & Niwano, Y., Cold atmospheric plasma enhances osteoblast differentiation. *PLoS One.* **12**, e0180507. DOI: <https://doi.org/10.1371/journal.pone.0180507> (2017).
  41. Cheng, H., Xu, J. X., Li, X., Liu, D. W., & Lu, X. P., On the dose of plasma medicine: Equivalent total oxidation potential (ETOP), *Phys. Plasmas* **27**, 063514. DOI: <https://doi.org/10.1063/5.0008881> (2020).
  42. Laurent, A., Nicco, C., Chéreau, C., Goulvestre, C., Alexandre, J., Alves, A., Lévy, E., Goldwasser, F., Panis, Y., Soubrane, O., Weill, B., & Batteux, F., Controlling tumor growth by modulating endogenous production of reactive oxygen species. *Cancer Res.* **65**, 948–956. DOI: 10.1158/0008-5472.CAN-05-2053 (2005).
  43. Yoshinari, M., Matsuzaka, K., & Inoue, T., Surface modification by cold-plasma technique for dental implants —Biofunctionalization with binding pharmaceuticals—. *Jpn. Dent. Sci. Rev.*, **47**, 89-101. DOI: <https://doi.org/10.1016/j.jdsr.2011.03.001> (2011).
  44. Dewez, J. L., Doren, A., Schneider, Y. J. & Rouxhet, P. G., Competitive adsorption of proteins: key of the relationship between substratum surface properties and adhesion of epithelial cells. *Biomaterials* **20**, 547-559. DOI: 10.1016/s0142-9612(98)00207-5 (1999).
  45. Wei, J., Igarashi, T., Okumori, N., Igarashi, T., Maetani, T., Liu, B., & Yoshinari, M., Influence of surface wettability on competitive protein adsorption and initial attachment of osteoblasts. *Biomed. Mater.* **4**, 045002. DOI: 10.1088/1748-6041/4/4/045002 (2009).
  46. Shibata, Y., Hosaka, M., Kawai, H., & Miyazaki, T., Glow discharge plasma treatment of titanium plates enhances adhesion of osteoblast-like cells to the plates through the integrin-mediated mechanism. *Int. J. Oral Maxillofac Implants*, **17**, 771-777 (2002).
  47. Zhao, Y., Wong, H. M., Lui, S. C., Chong, E. Y. W., Wu, G., Zhao, X., Wang, C., Pan, H., Cheung, K. M. C., Wu, s., Chu, P. K., & Yeung, K. W. K., Plasma surface functionalized polyetheretherketone

- for enhanced osseointegration at bone-implant interface. *ACS Appl. Mater. Interfaces*. **17**,8(6):3901-11. DOI: 10.1021/acsami.5b10881 (2016).
48. Ruskin, E. I., Coomar, P. P., Sikder, P., & Bhaduri, S. B., Magnetic calcium phosphate cement for hyperthermia treatment of bone tumors, *Materials (Basel)*. **13**, 3501. DOI: 10.3390/ma13163501 (2020).
  49. Kajiya, H., Katsumata, Y., Sasaki, M., Tsutsumi, T., Kawaguchi, M., & Fukushima, T., Photothermal stress triggered by near-infrared-irradiated carbon nanotubes up-regulates osteogenesis and mineral deposition in tooth-extracted sockets. *Int. J. Hyperth.*, **31**, 635–642. DOI: 10.3109/02656736.2015.1041430 (2015)
  50. Chen, J., Shi, Z.-D., Ji, X., Morales, J., Zhang, J., Kaur, N., & Wang, S., Enhanced osteogenesis of human mesenchymal stem cells by periodic heat shock in self-assembling peptide hydrogel. *Tissue Eng. Part A*. **19**, 716–728. DOI: 10.1089/ten.TEA.2012.0070 (2013)
  51. Li, M., Fuchs, S., Böse, T., Schmidt, H., Hofmann, A., Tonak, M., Unger, R., & Kirkpatrick, C. J., Mild heat stress enhances angiogenesis in a co-culture system consisting of primary human osteoblasts and outgrowth endothelial cells. *Tissue Eng. Part C Methods*. **20**, 328–39. DOI: 10.1089/ten.TEC.2013.0087 (2014).
  52. Eggers, B., Marciniak, J., Memmert, S., Kramer, F. J., Deschner, J., & Nokhbehshaim, M., The beneficial effect of cold atmospheric plasma on parameters of molecules and cell function involved in wound healing in human osteoblast-like cells in vitro. *Odontology*. **108**, 607-616. DOI: 10.1007/s10266-020-00487-y (2020)
  53. Virard, F., Cousty, S., Cambus, J.-P., Valentin, A., Kémoun, P., & Clément, F., Cold atmospheric plasma induces a predominantly necrotic cell death via the microenvironment. *PLoS One*. **10**, e0133120. DOI: 10.1371/journal.pone.0133120 (2015).
  54. Hoff, P., Gaber, T., Strehl, C., Schmidt-Bleek, K., Lang, A., Huscher, D., Burmester, G. R., Schmidmaier, G., Perka, C., Duda, G. N., & Buttgerit, F., Immunological characterization of the early human fracture hematoma. *Immunol Res*. **64**, 1195–1206. DOI: 10.1007/s12026-016-8868-9 (2016).
  55. Lisowska, B., Kosson, D., & Domaracka, K., Positives and negatives of nonsteroidal anti-inflammatory drugs in bone healing: the effects of these drugs on bone repair. *Drug Des. Devel. Ther.* **12**, 1809-1814. DOI: 10.2147/DDDT.S164565 (2018).

## Figure captions

**Fig 1** Experimental set-up of helium microplasma jet to measure voltage and current measurements, and optical emission spectroscopy for understanding fundamental plasma properties. 1B shows a sinusoidal high voltage waveform and typical bullet current. 1D shows an optical emission spectrum of plasma jet mainly N<sub>2</sub> 2nd positive systems. 1E shows a large bone defect model of ulna on the foreleg of New Zealand White Rabbits and 1F shows a plasma treatment on the large bone defect.

**Fig 2** X-ray imaging results of a large bone defect model of rabbit were taken up to 8 weeks. 1A shows X-ray images as depended on the plasma treatment time. 1B shows bone occupancy of bone defect site at 8 weeks after a single plasma treatment and 1C shows evaluations of cortical thickening and patchy cortex thickening for treatment times at every two weeks.

**Fig 3** Micro-computed tomography ( $\mu$ -CT) analysis and pathology results. 3A evaluated the volume of new bone as plasma treatment time and 3B-3E show  $\mu$ -CT images of control (0 min) and plasma treatments: C for 5 min, D for 10 min, and E for 15 min, respectively.

**Fig 4** Histological sections were stained with hematoxylin and eosin (H&E) as a function of plasma treatment time: 4A for 0 min, 4B for 5 min, 4C for 10 min, and 4D for 15 min, respectively. Figures include a 200  $\mu$ m scale bar.

**Fig 5** Histological section was stained with Masson's trichrome as a function of plasma treatment time: 5A for 0 min, 5B for 5 min, 5C for 10 min, and 5D for 15 min, respectively. Figures include a 2 mm scale bar.

**Fig 6** In comparison between 6A and 6B, wet surface after plasma treatment was observed. 6C shows a wide scan of XPS spectra measured on-site plasma treatment. Significant increase of O1s but decrease of C1s after the plasma treatment. Also, basic components of calcium and phosphorus are appeared after the treatment. Surface temperature increased around 43 °C after 10 min plasma treatment.

## Acknowledgements (not compulsory)

K.O., H.T., J.-S.O, and T.S. acknowledge a JSPS KAKENHI Grant Number JP19K03811. H.T. thanks financial support from the Osaka Medical Research Foundation for Intractable Diseases and the Nakatomi Foundation. J.-S.O and T.S. thank for financial support from the Osaka City University (OCU) Strategic Research Grant 2019 for Top Priority Researches.

## Author contributions statement

A.S., H.T., K.O., and Y.H. contributed to developing the experimental protocol and conducting most of the experiments and prepared the script. K.A., J.-S.O. and T.S. conducted the experiments and reviewed the script. H.N. and H.T. contributed to developing the experimental protocol, writing, and reviewing the script.

## Additional information

**Ethical approval:** Study approval was obtained from Osaka City University Graduate of Medicine and all investigations were conducted in accordance with the Osaka City University Hospital ethical principles of research.

**Competing interests:** The authors declare that they have no competing interests.



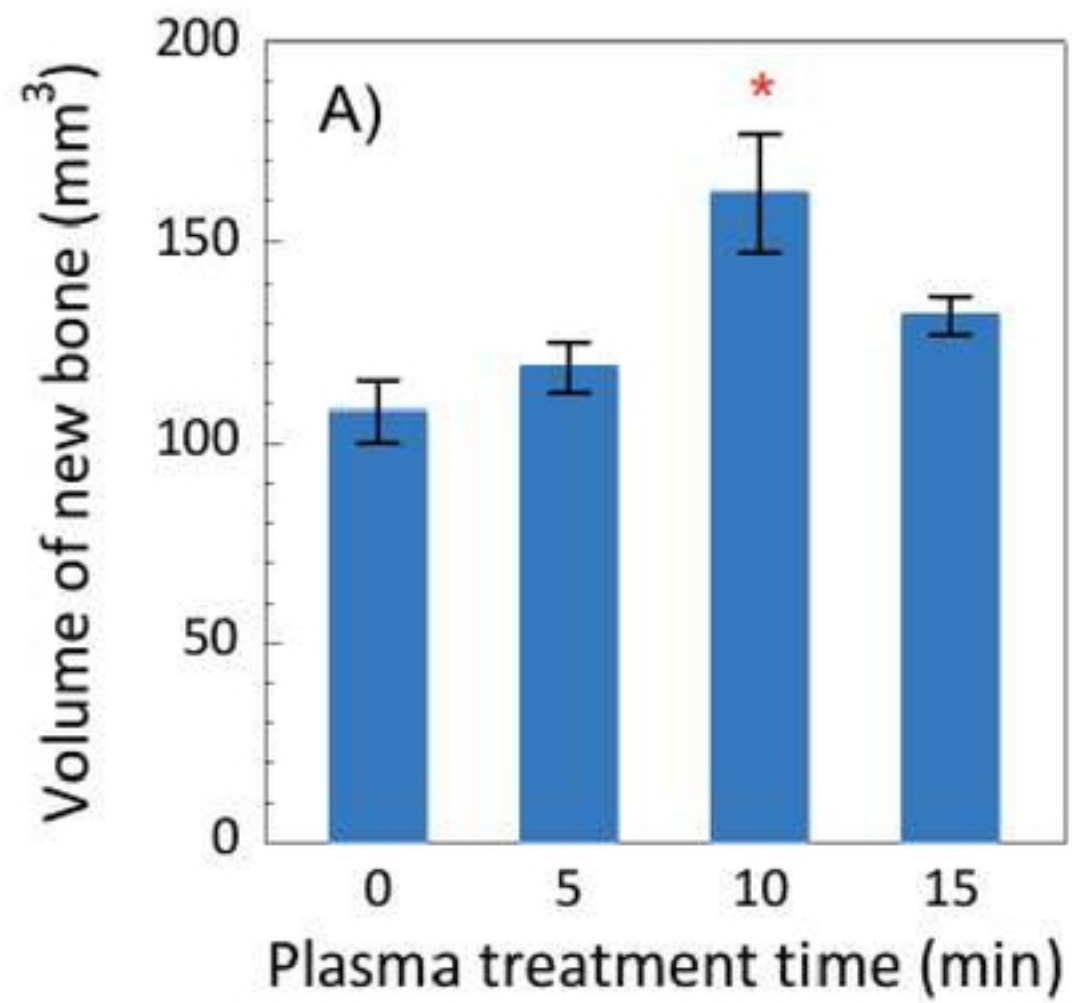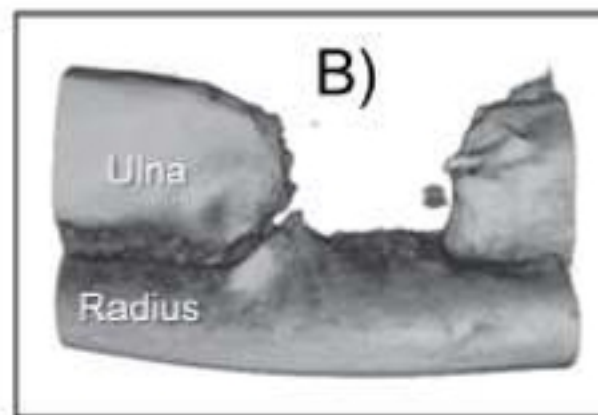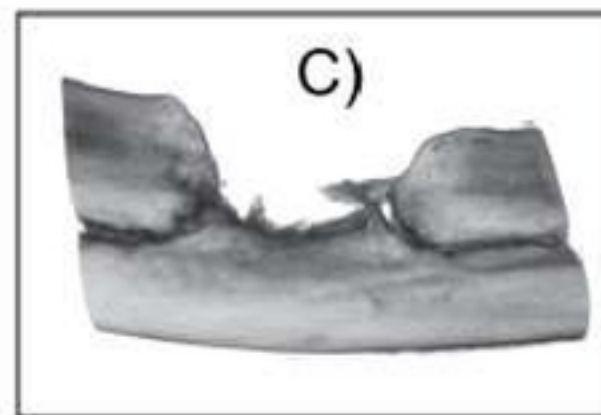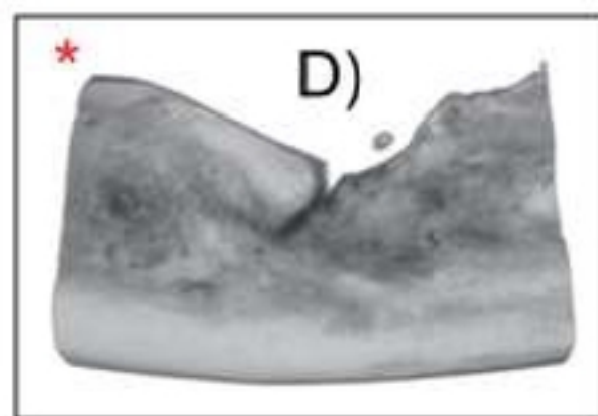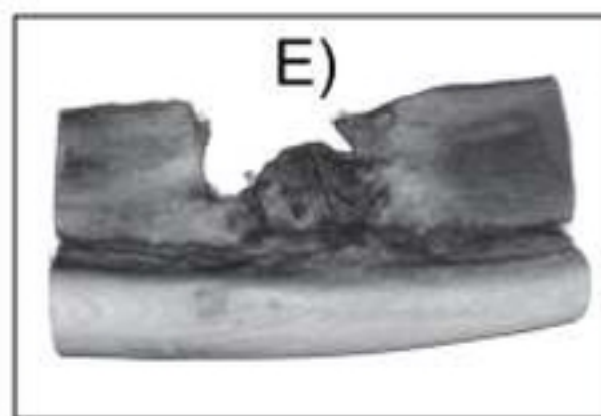

Fig3



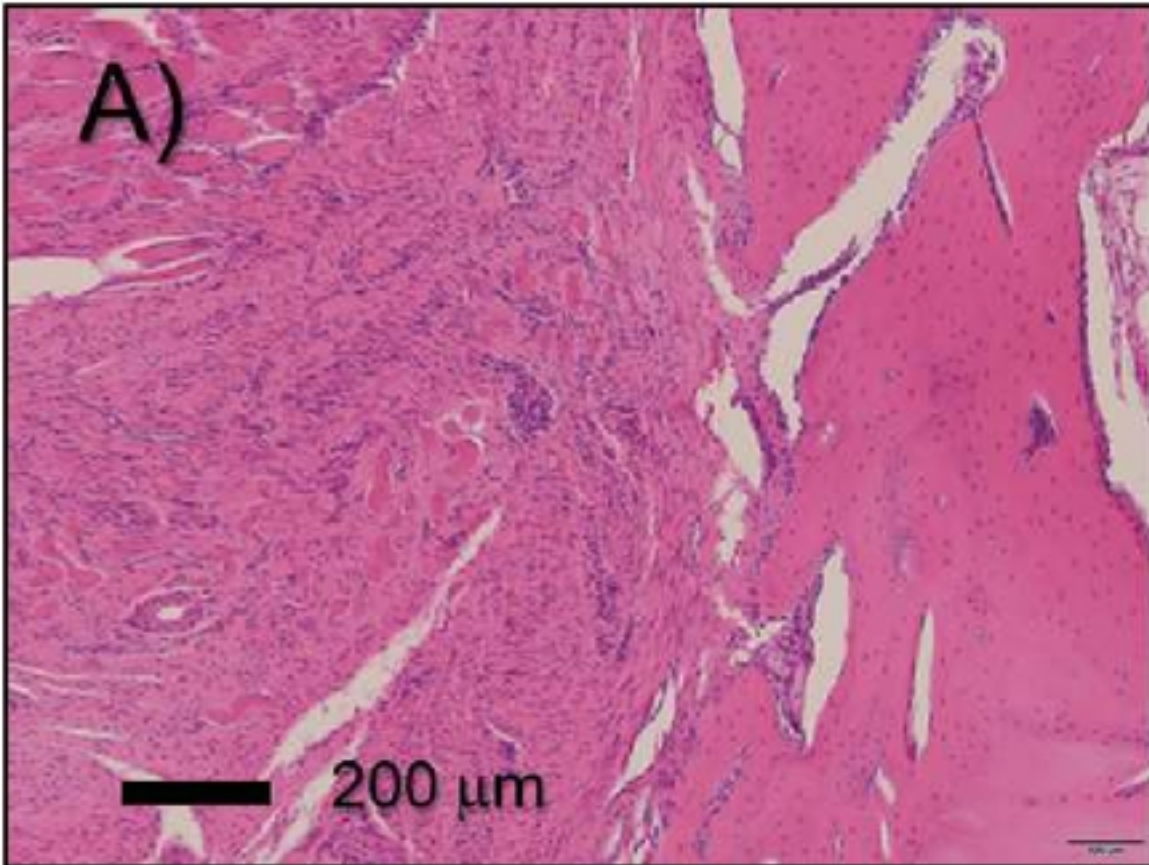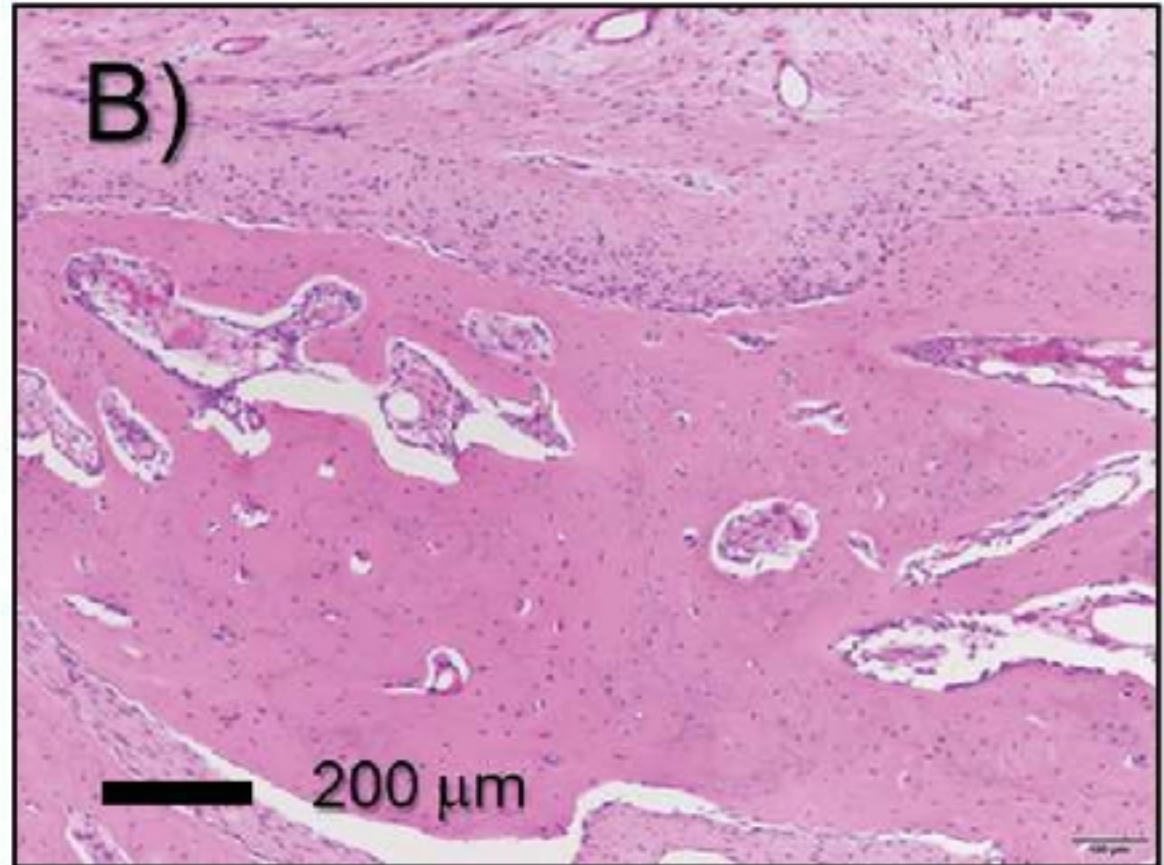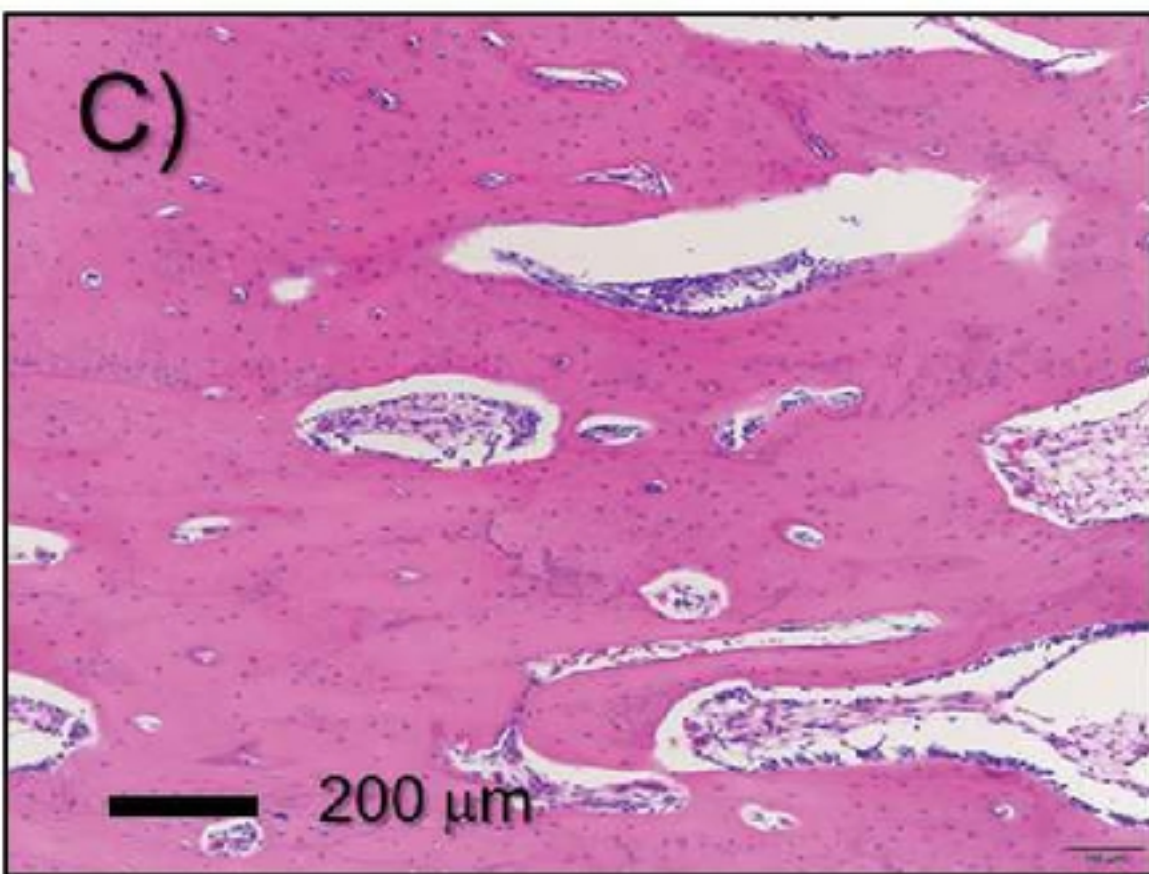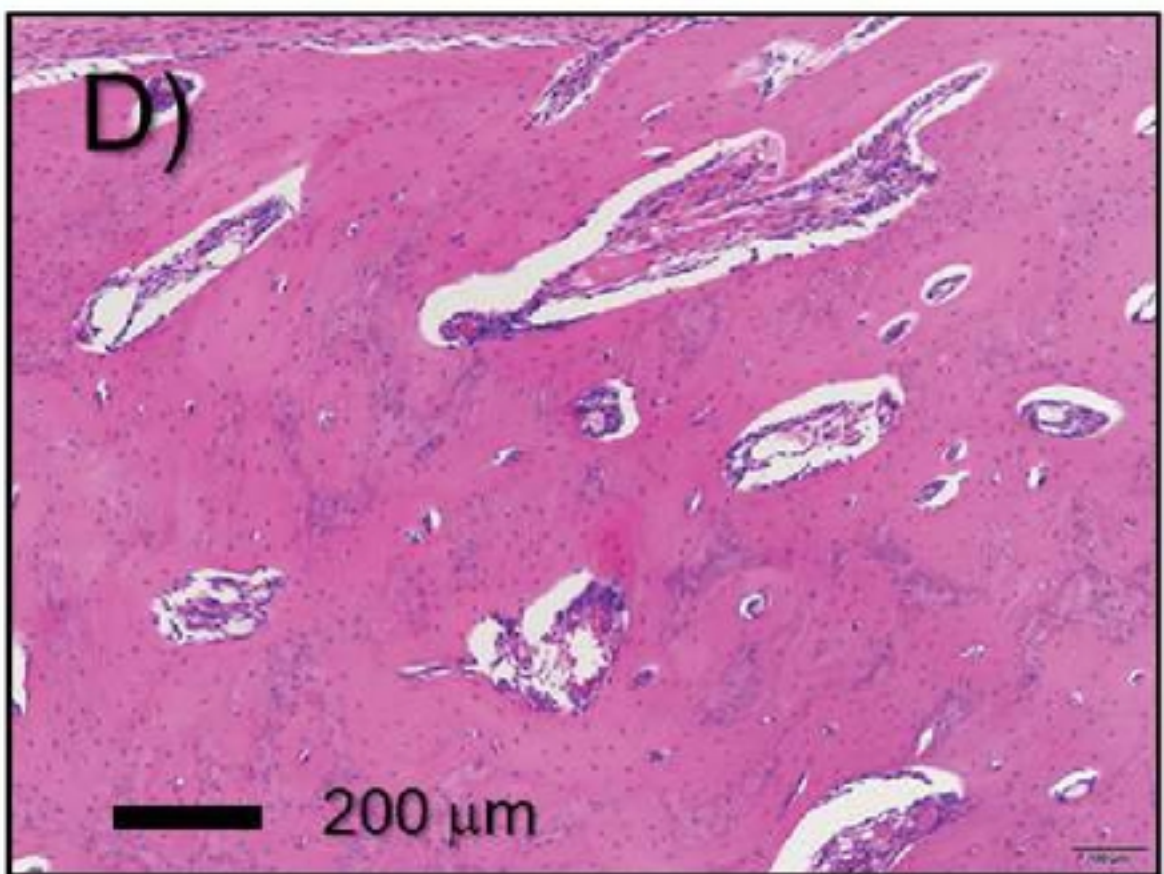

Fig4



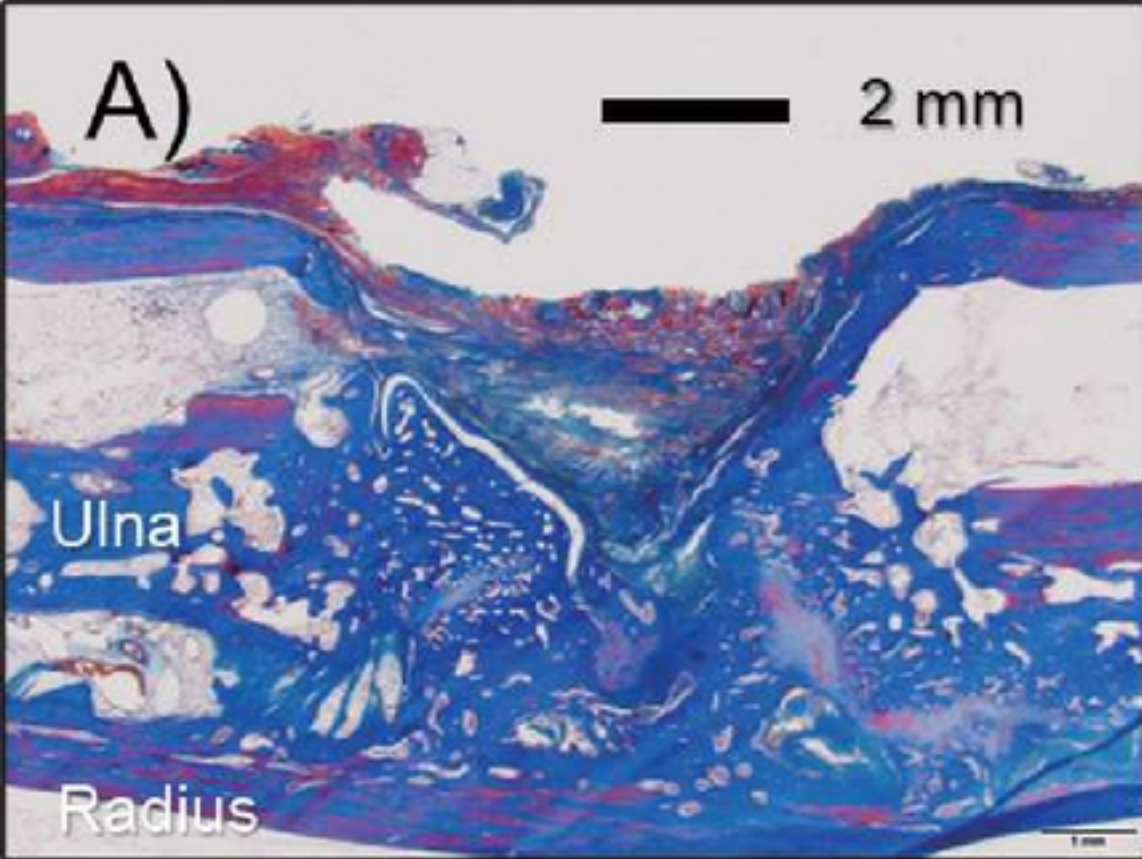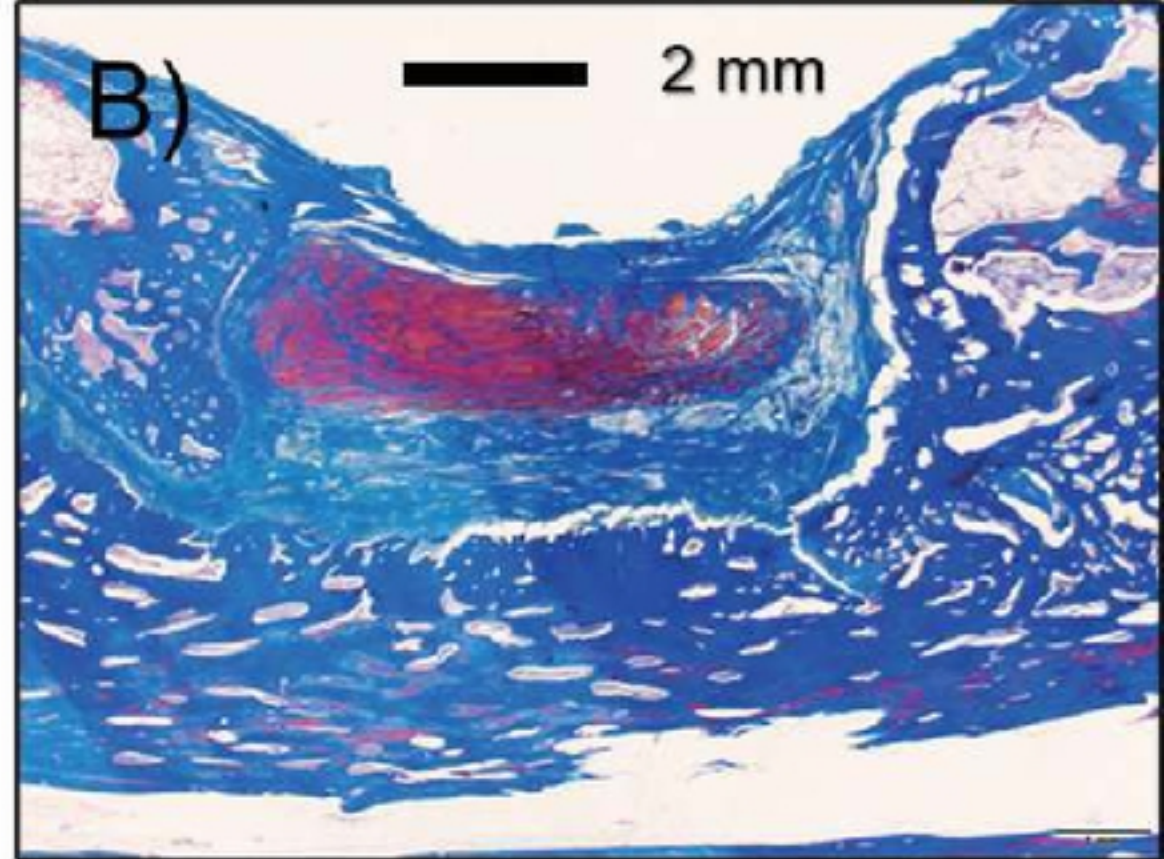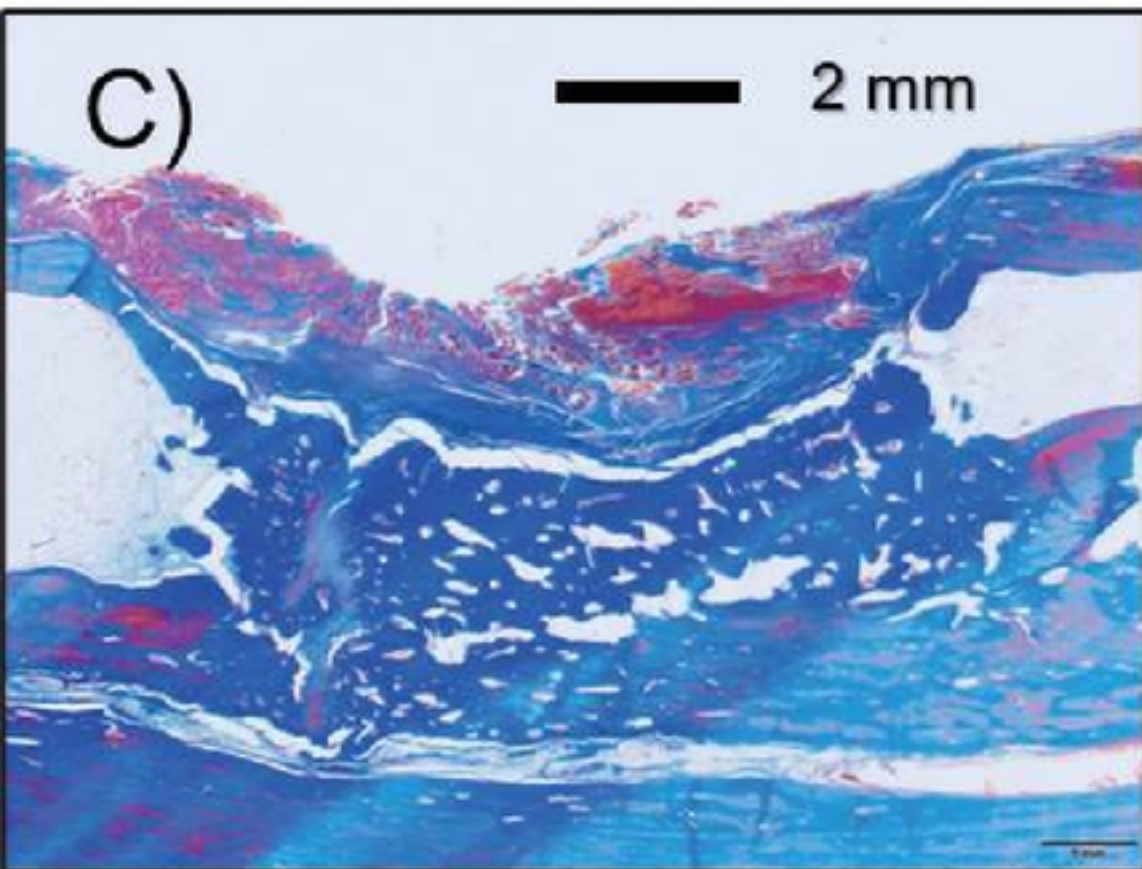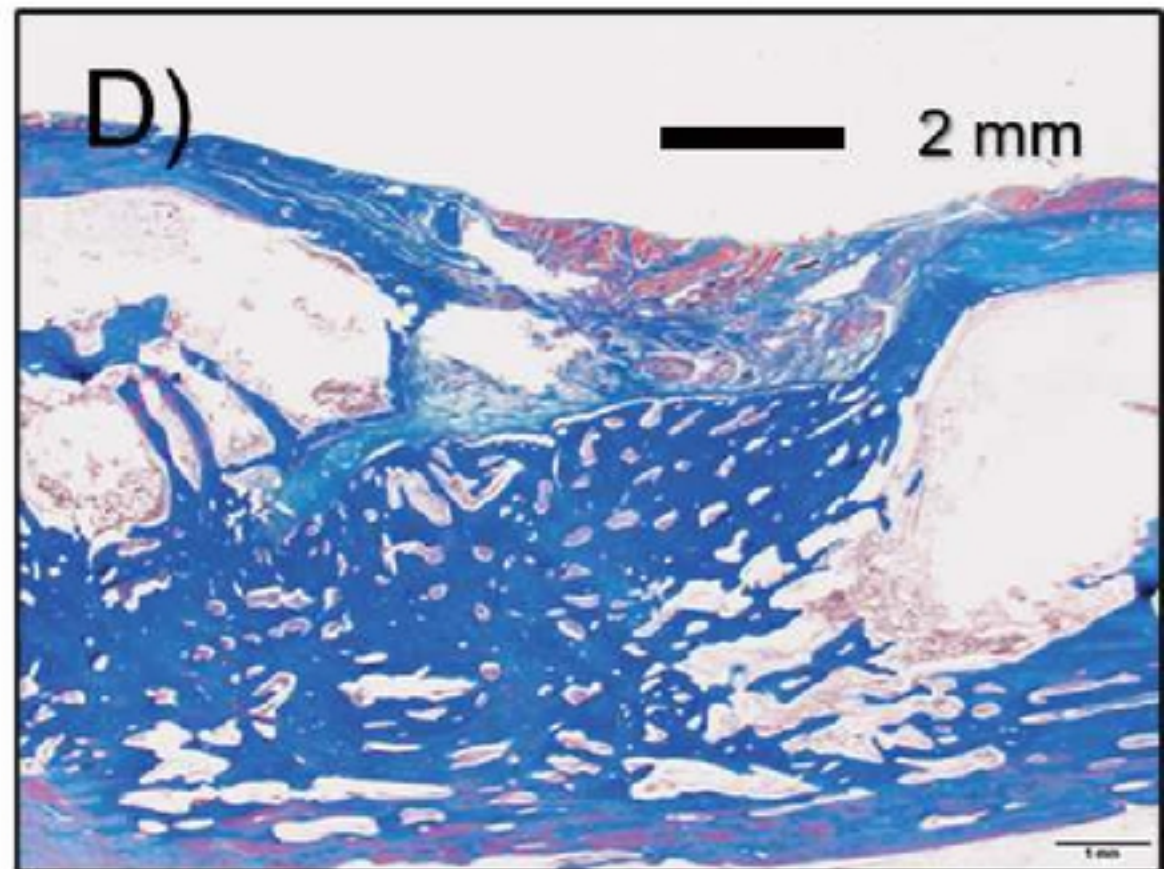

Fig5



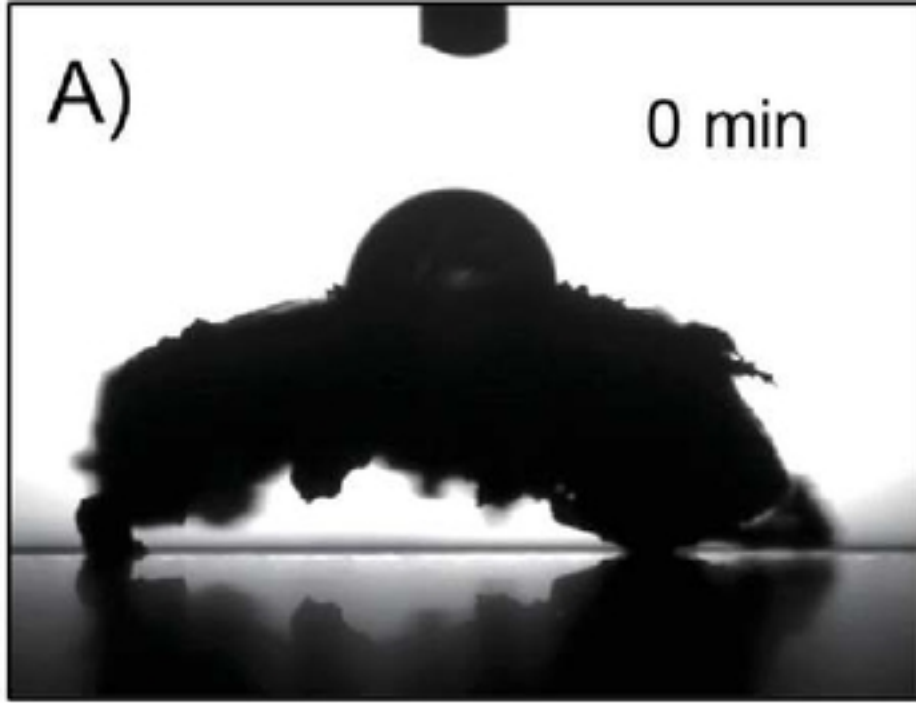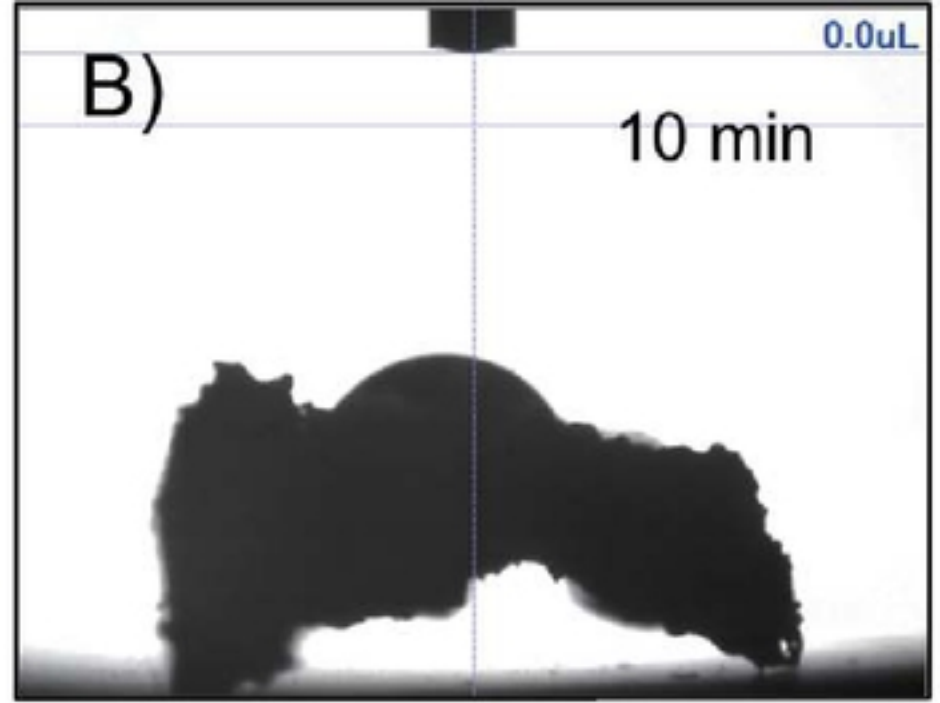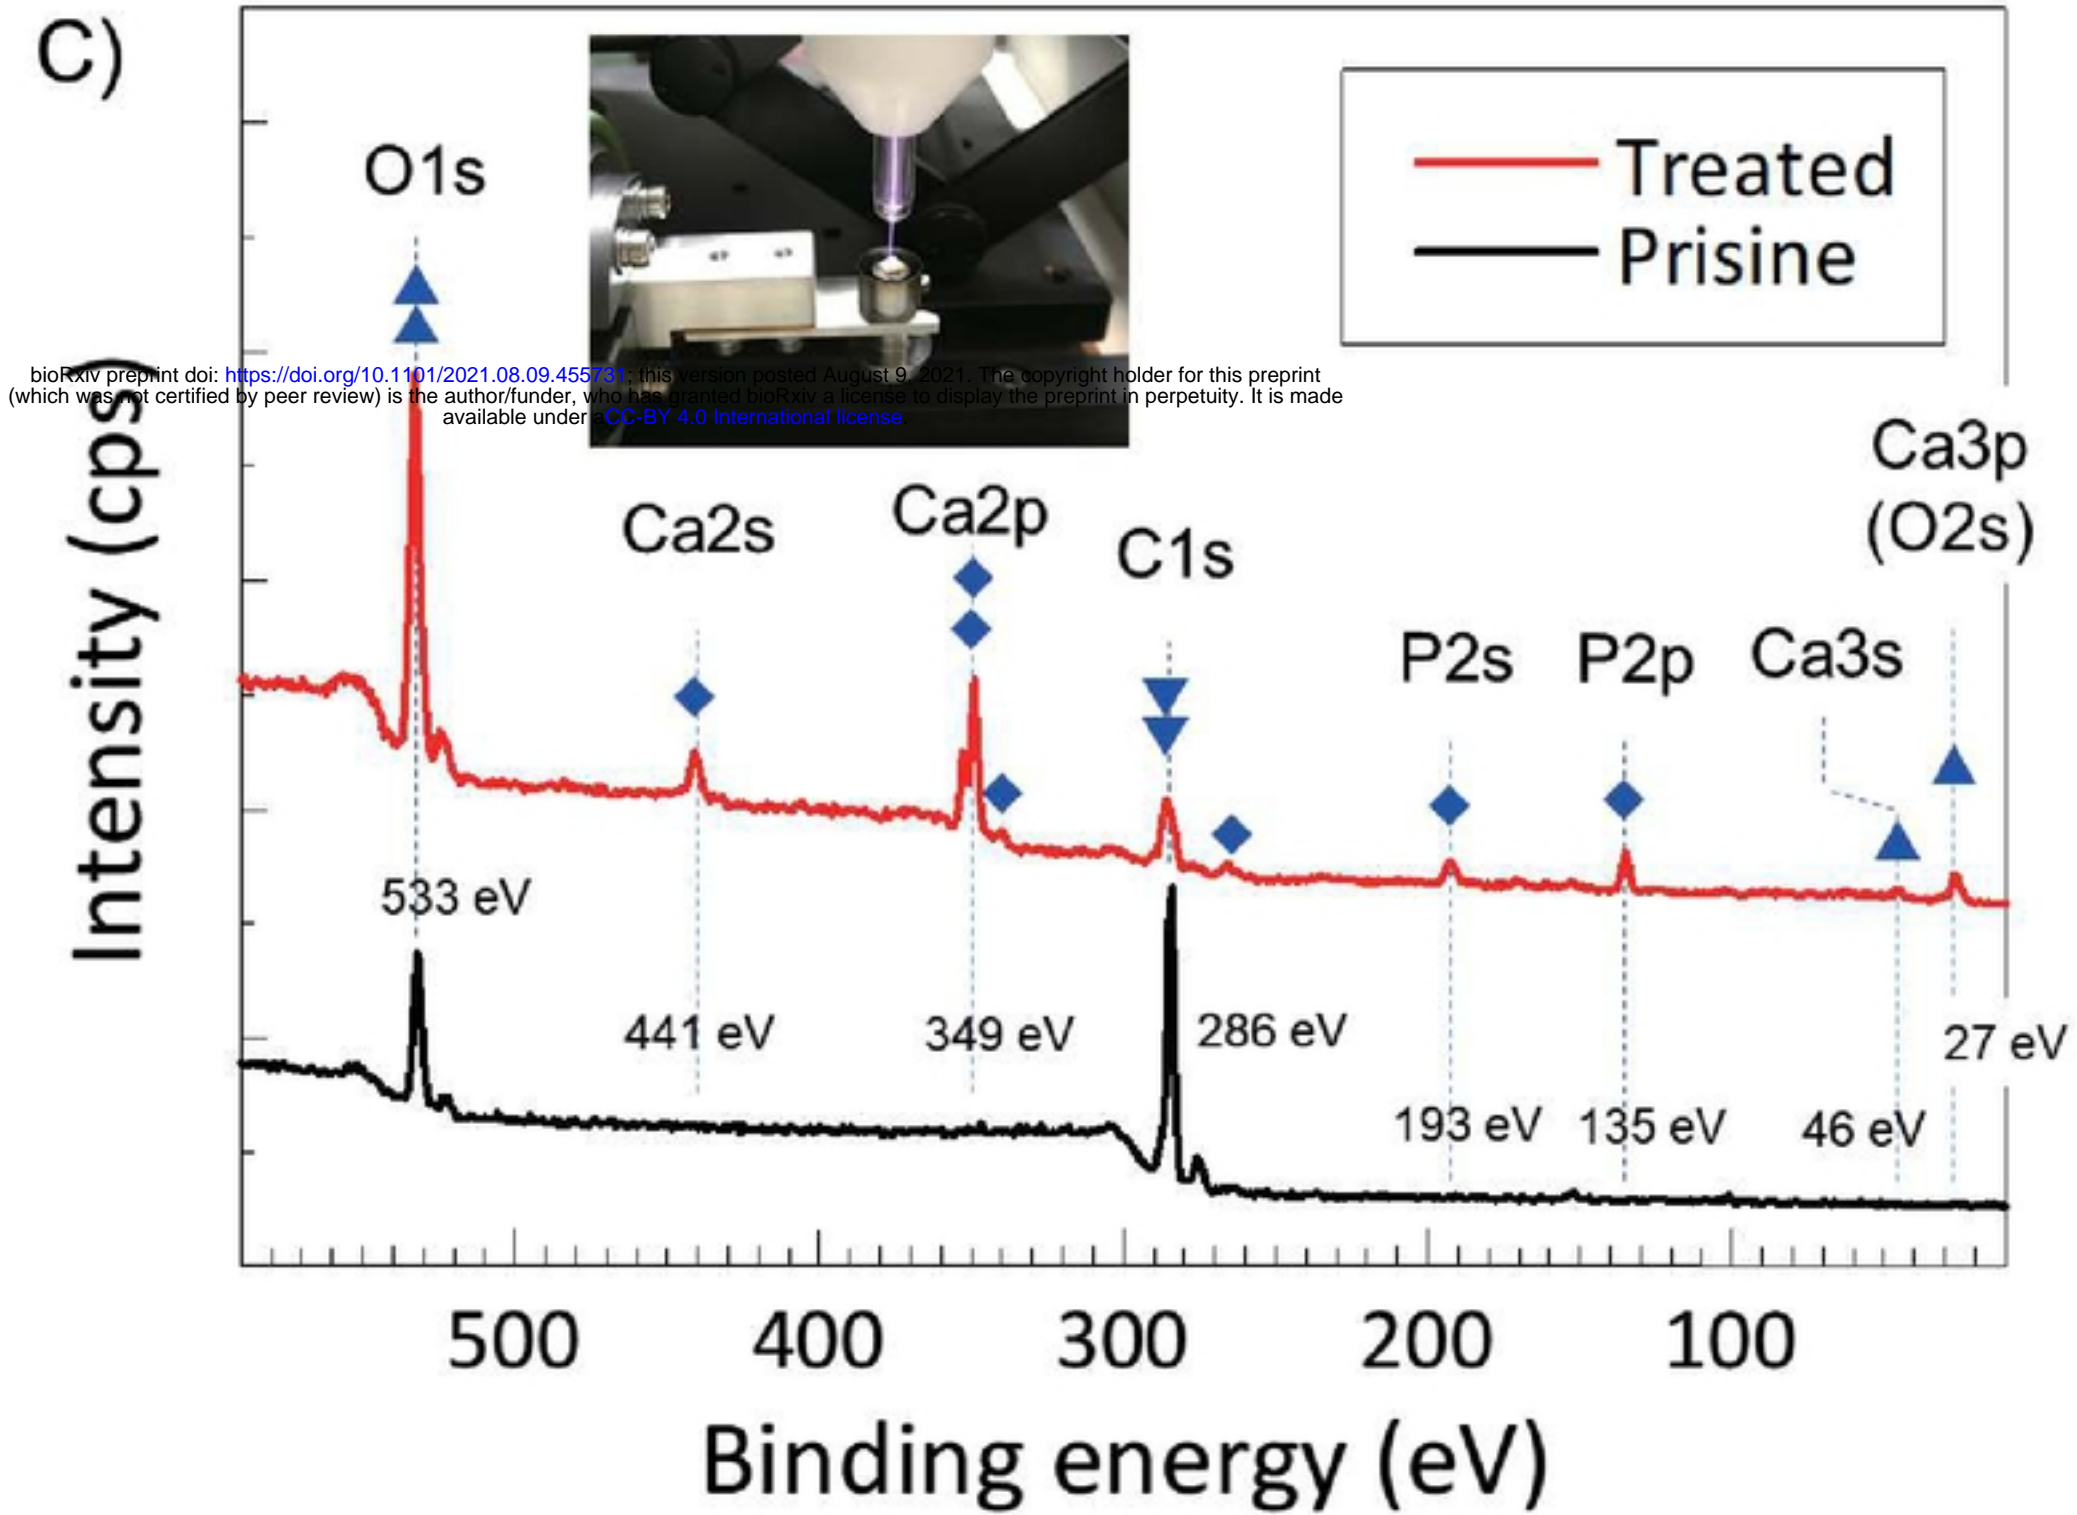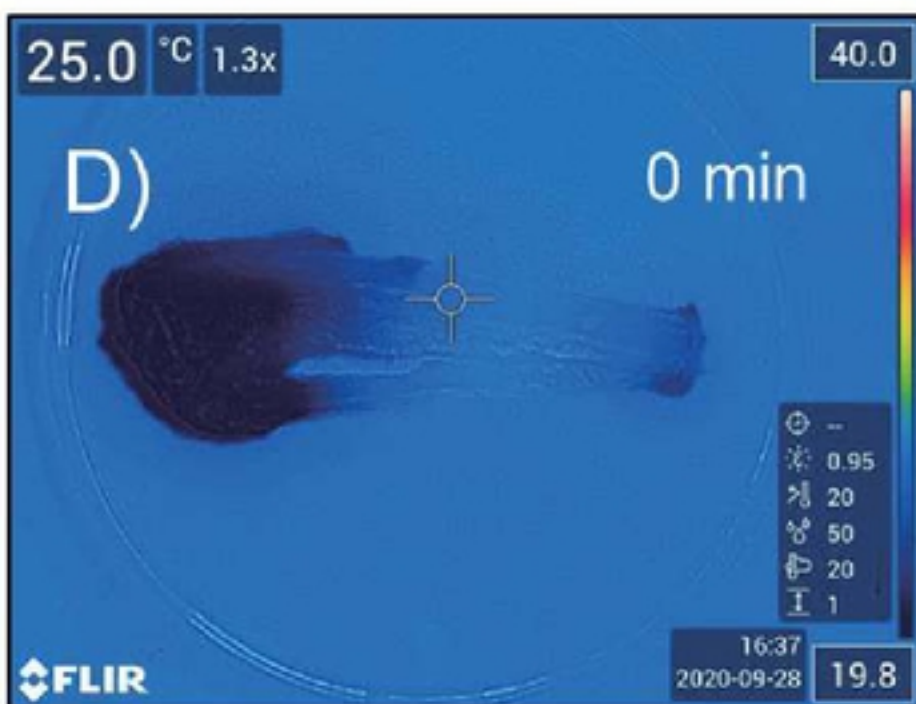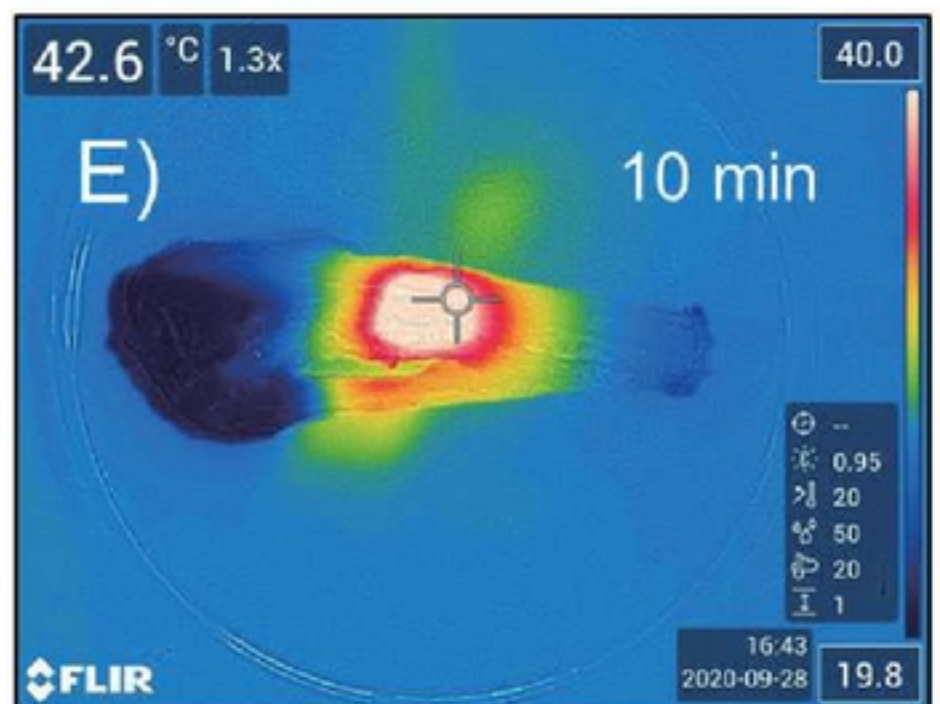

Fig6



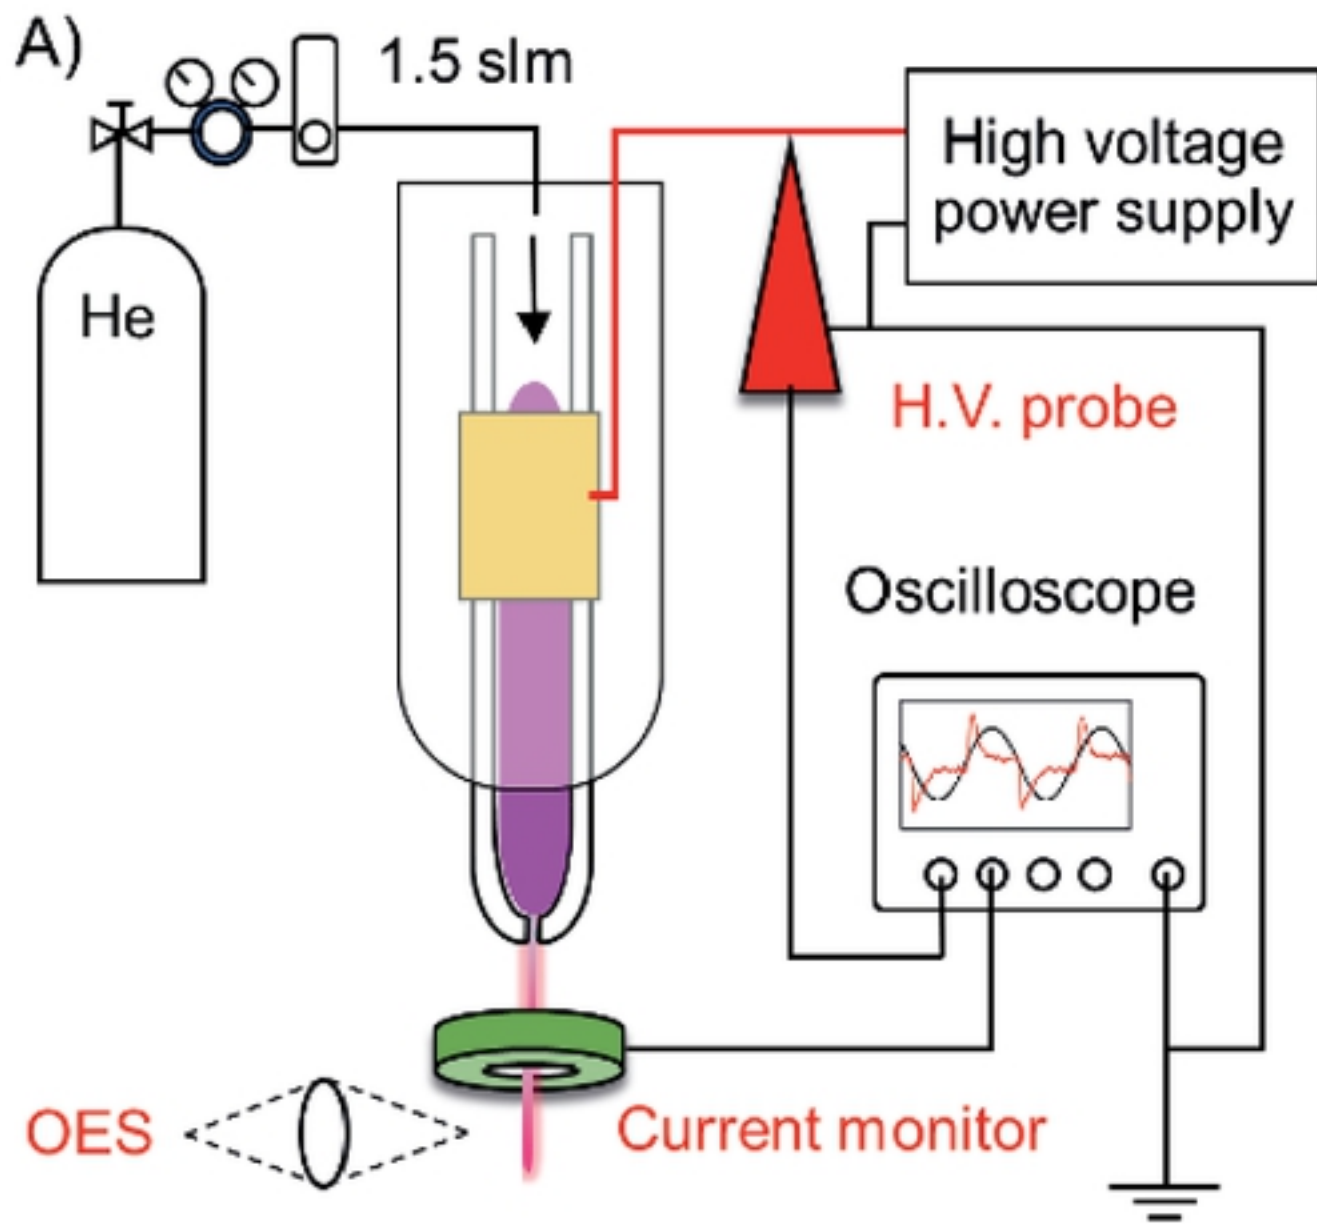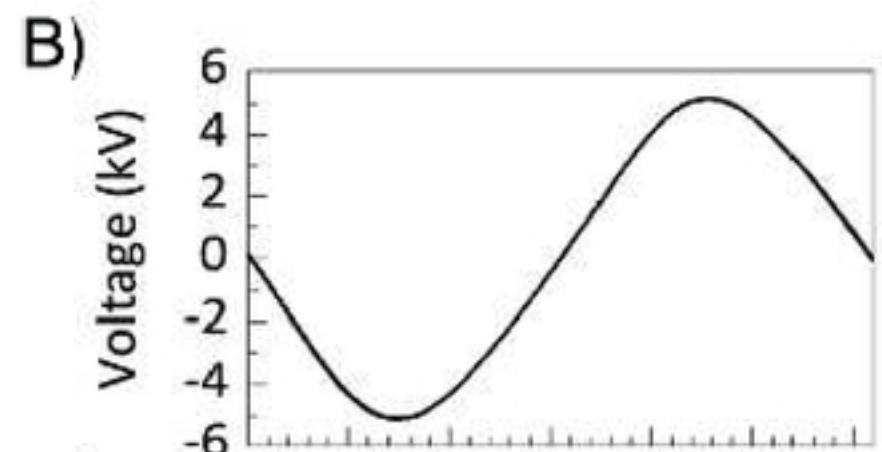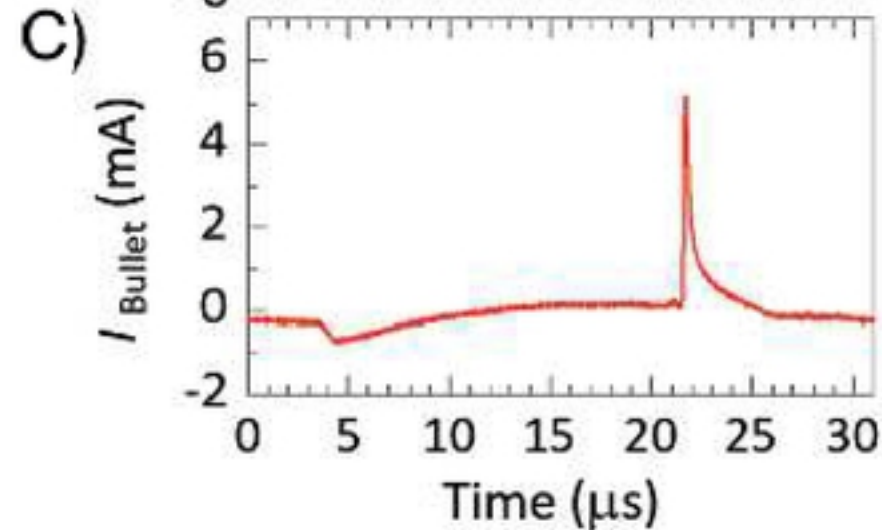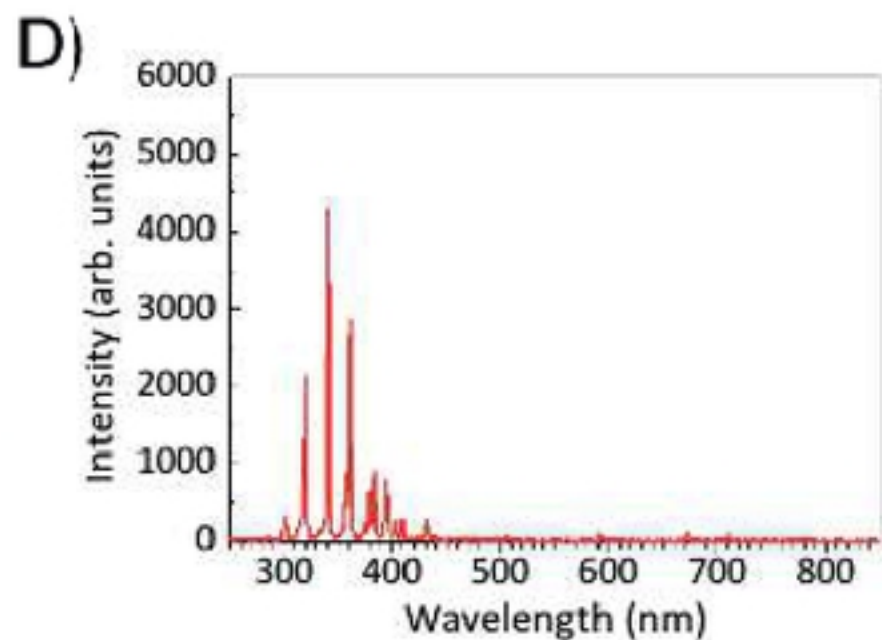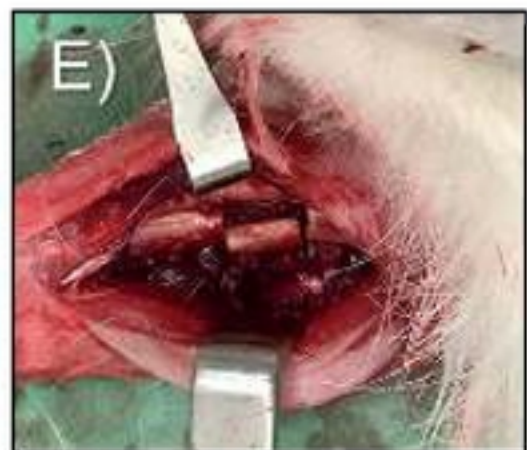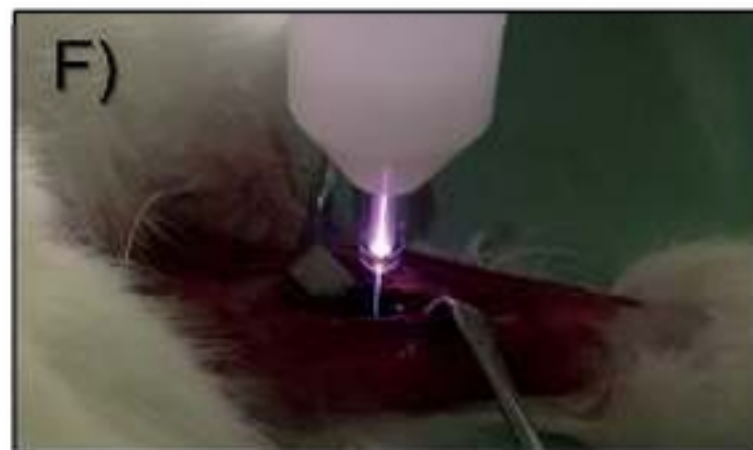

Fig1

A)

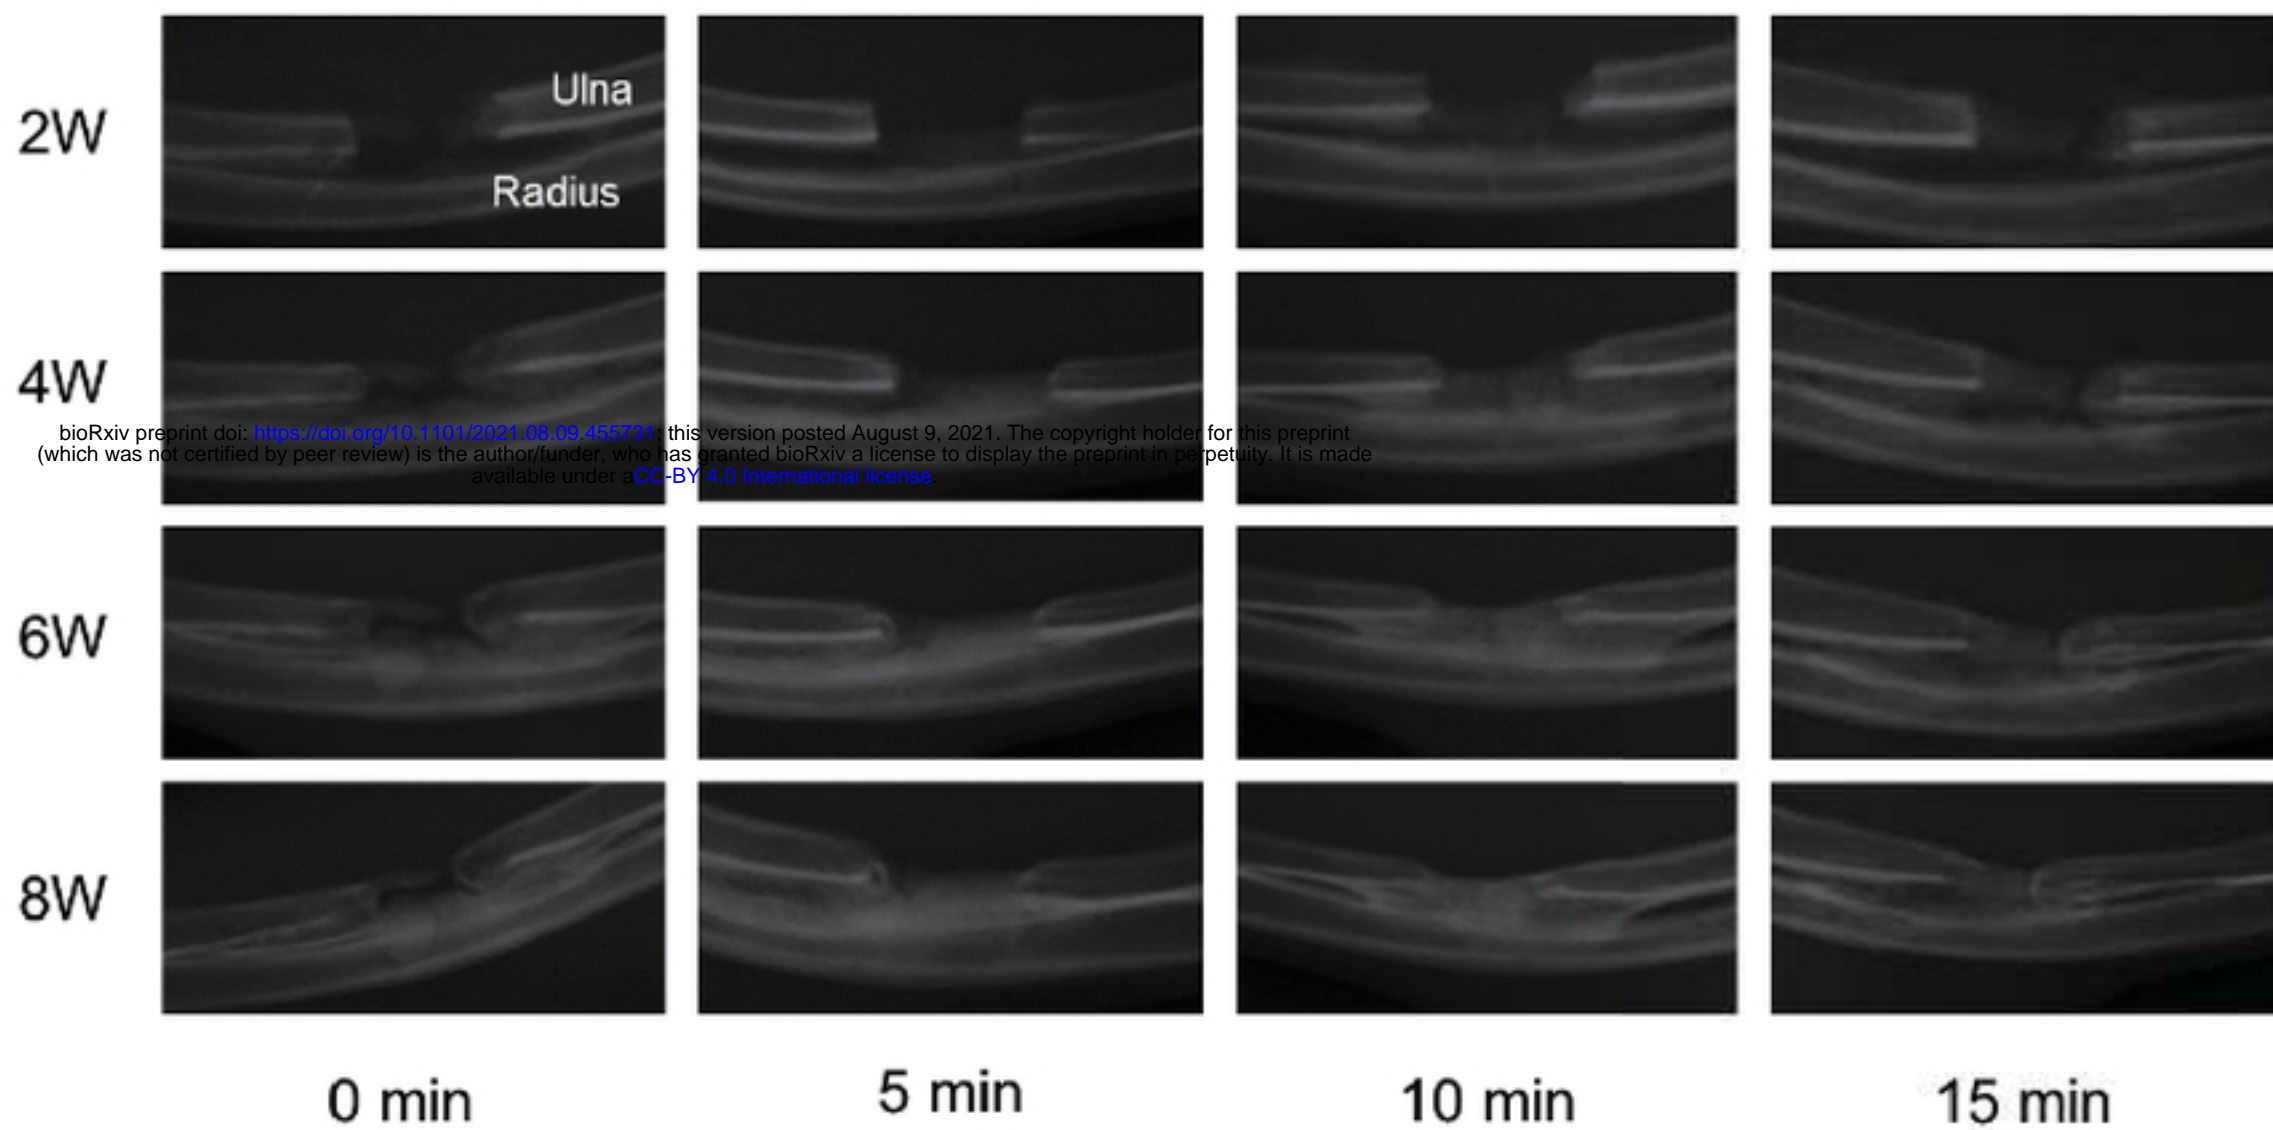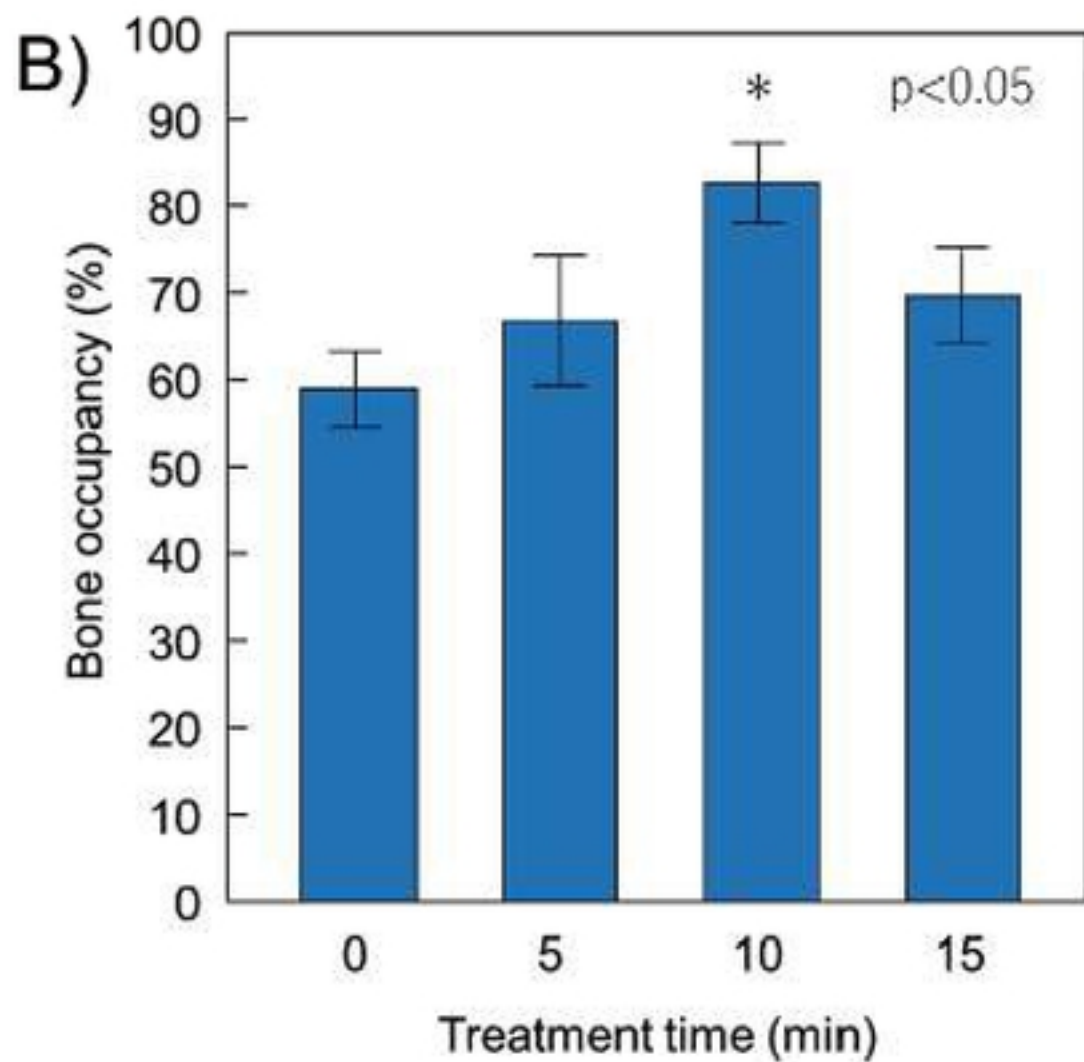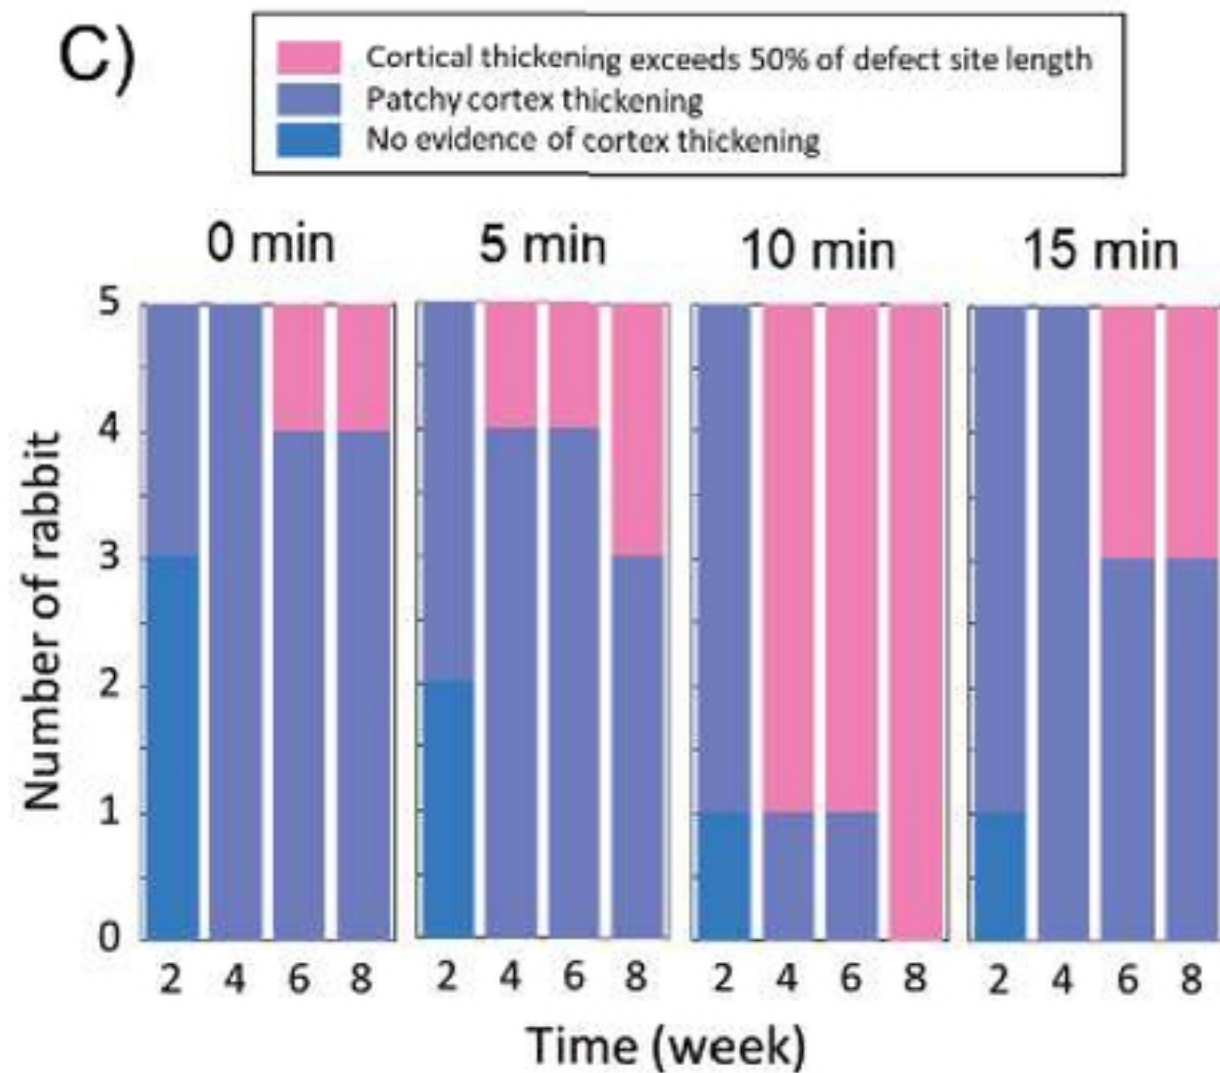

Fig2
